# Supplementary material for: Cleavage of [Pd2(PP)2(μ-Cl)2][BArF24]2 (PP = Bis(phosphino)ferrocene, BArF24 = Tetrakis(3,5-bis(trifluoromethyl)phenyl)borate) with Monodentate Phosphines
Source: MDPI journal article supplement (doi:10.3390/molecules29092047), 2024-04-29
Supplement: s1 [file s1]

## Supporting Information

| Fig. | Table                                                                                                                                                                                                     | Pg. |
|------|-----------------------------------------------------------------------------------------------------------------------------------------------------------------------------------------------------------|-----|
| S1   | $^{31}\text{P}\{^1\text{H}\}$ NMR spectrum of $[\text{Pd}_2(\text{dfurpf})_2(\mu\text{-Cl})_2][\text{BArF}_{24}]_2$ in $\text{CD}_2\text{Cl}_2$ .                                                         | S4  |
| S2   | $^{31}\text{P}\{^1\text{H}\}$ NMR spectrum of $[\text{Pd}(\text{dippf})(\text{PMe}_3)\text{Cl}][\text{BArF}_{24}]$ in $\text{CD}_2\text{Cl}_2$ .                                                          | S5  |
| S3   | $^{31}\text{P}\{^1\text{H}\}$ NMR spectrum of $[\text{Pd}(\text{dippf})(\text{PPh}_3)\text{Cl}][\text{BArF}_{24}]$ in $\text{CD}_2\text{Cl}_2$ .                                                          | S6  |
| S4   | $^{31}\text{P}\{^1\text{H}\}$ NMR spectrum of $[\text{Pd}(\text{dippf})(\text{PPh}_2\text{Fc})\text{Cl}][\text{BArF}_{24}]$ in $\text{CD}_2\text{Cl}_2$ .                                                 | S7  |
| S5   | $^{31}\text{P}\{^1\text{H}\}$ NMR spectrum of $[\text{Pd}(\text{dppdtbpf})(\text{PMe}_3)\text{Cl}][\text{BArF}_{24}]$ in $\text{CD}_2\text{Cl}_2$ .                                                       | S8  |
| S6   | $^{31}\text{P}\{^1\text{H}\}$ NMR spectrum of $[\text{Pd}(\text{dppdtbpf})(\text{PPh}_2\text{Fc})\text{Cl}][\text{BArF}_{24}]$ in $\text{CD}_2\text{Cl}_2$ .                                              | S9  |
| S7   | $^{31}\text{P}\{^1\text{H}\}$ NMR spectrum of $[\text{Pd}(\text{dcpf})(\text{PMe}_3)\text{Cl}][\text{BArF}_{24}]$ in $\text{CD}_2\text{Cl}_2$ .                                                           | S10 |
| S8   | $^{31}\text{P}\{^1\text{H}\}$ NMR spectrum of $[\text{Pd}(\text{dfurpf})(\text{PMe}_3)\text{Cl}][\text{BArF}_{24}]$ in $\text{CDCl}_3$ .                                                                  | S11 |
| S9   | $^{31}\text{P}\{^1\text{H}\}$ NMR spectrum of $[\text{Pd}(\text{dfurpf})(\text{PPh}_3)\text{Cl}][\text{BArF}_{24}]$ in $\text{CD}_2\text{Cl}_2$ .                                                         | S12 |
| S10  | $^{31}\text{P}\{^1\text{H}\}$ NMR spectrum of $[\text{Pd}(\text{dfurpf})(\text{PPh}_2\text{Fc})\text{Cl}][\text{BArF}_{24}]$ in $\text{CD}_2\text{Cl}_2$ .                                                | S13 |
| S11  | $^{31}\text{P}\{^1\text{H}\}$ NMR spectrum of $[\text{Pd}(\text{dppf})(\text{P}(\text{NMe}_2)_3)\text{Cl}][\text{BArF}_{24}]$ in $\text{CD}_2\text{Cl}_2$ .                                               | S14 |
| S12  | $^{31}\text{P}\{^1\text{H}\}$ NMR spectrum of $[\text{Pd}(\text{dppf})(\text{P}^i\text{Pr}_3)\text{Cl}][\text{BArF}_{24}]$ in $\text{CD}_2\text{Cl}_2$ .                                                  | S15 |
| S13  | $^{31}\text{P}\{^1\text{H}\}$ NMR spectrum of $[\text{Pd}(\text{dppf})(\text{P}(\text{CH}_2\text{Ph})_3)\text{Cl}][\text{BArF}_{24}]$ in $\text{CD}_2\text{Cl}_2$ .                                       | S16 |
| S14  | $^{31}\text{P}\{^1\text{H}\}$ NMR spectrum of $[\text{Pd}(\text{dppf})(\text{P}(m\text{-tol})_3)\text{Cl}][\text{BArF}_{24}]$ in $\text{CD}_2\text{Cl}_2$ .                                               | S17 |
| S15  | $^{31}\text{P}\{^1\text{H}\}$ NMR spectrum of $[\text{Pd}(\text{dppf})(\text{P}(p\text{-tol})_3)\text{Cl}][\text{BArF}_{24}]$ in $\text{CD}_2\text{Cl}_2$ .                                               | S18 |
| S16  | $^{31}\text{P}\{^1\text{H}\}$ NMR spectrum of $[\text{Pd}(\text{dppf})(\text{P}(p\text{-C}_6\text{H}_4\text{OMe})_3)\text{Cl}][\text{BArF}_{24}]$ in $\text{CD}_2\text{Cl}_2$ .                           | S19 |
| S17  | $^{31}\text{P}\{^1\text{H}\}$ NMR spectrum of $[\text{Pd}(\text{dppf})(\text{P}(p\text{-C}_6\text{H}_4\text{F})_3)\text{Cl}][\text{BArF}_{24}]$ in $\text{CD}_2\text{Cl}_2$ .                             | S20 |
| S18  | $^{31}\text{P}\{^1\text{H}\}$ NMR spectrum of $[\text{Pd}(\text{dfurpf})(\text{P}(p\text{-C}_6\text{H}_4\text{CF}_3)_3)\text{Cl}][\text{BArF}_{24}]$ in $\text{CD}_2\text{Cl}_2$ .                        | S21 |
|      | S1 Crystal data and structure analysis results for $[\text{Pd}_2(\text{dppdtbpf})_2(\mu\text{-Cl})_2][\text{BArF}_{24}]_2$ .                                                                              | S22 |
|      | S2 Crystal data and structure analysis results for monodentate alkyl phosphines.                                                                                                                          | S23 |
|      | S3 Crystal data and structure analysis results for monodentate aryl phosphines.                                                                                                                           | S24 |
| S19  | $\%V_{\text{bur}}$ calculation for the dppdtbpf ligand in $[\text{Pd}_2(\text{dppdtbpf})_2(\mu\text{-Cl})_2][\text{BArF}_{24}]_2$ .                                                                       | S25 |
| S20  | $\%V_{\text{bur}}$ calculation for the dippf ligand in $[\text{Pd}(\text{dippf})(\text{PMe}_3)\text{Cl}][\text{BArF}_{24}]$ .                                                                             | S26 |
| S21  | $\%V_{\text{bur}}$ calculation for the $\text{PMe}_3$ ligand in $[\text{Pd}(\text{dippf})(\text{PMe}_3)\text{Cl}][\text{BArF}_{24}]$ .                                                                    | S27 |
| S22  | $\%V_{\text{bur}}$ calculation for the dcpf ligand in $[\text{Pd}(\text{dcpf})(\text{PMe}_3)\text{Cl}][\text{BArF}_{24}]$ .                                                                               | S28 |
| S23  | $\%V_{\text{bur}}$ calculation for the $\text{PMe}_3$ ligand in $[\text{Pd}(\text{dcpf})(\text{PMe}_3)\text{Cl}][\text{BArF}_{24}]$ .                                                                     | S29 |
| S24  | $\%V_{\text{bur}}$ calculation for the dppf ligand in $[\text{Pd}(\text{dppf})(\text{P}^i\text{Pr}_3)\text{Cl}][\text{BArF}_{24}]$ .                                                                      | S30 |
| S25  | $\%V_{\text{bur}}$ calculation for the $\text{P}^i\text{Pr}_3$ ligand in $[\text{Pd}(\text{dppf})(\text{P}^i\text{Pr}_3)\text{Cl}][\text{BArF}_{24}]$ .                                                   | S31 |
| S26  | $\%V_{\text{bur}}$ calculation for the dppf ligand in $[\text{Pd}(\text{dppf})(\text{P}(p\text{-C}_6\text{H}_4\text{F})_3)\text{Cl}][\text{BArF}_{24}]$ .                                                 | S32 |
| S27  | $\%V_{\text{bur}}$ calculation for the $\text{P}(p\text{-C}_6\text{H}_4\text{F})_3$ ligand in $[\text{Pd}(\text{dppf})(\text{P}(p\text{-C}_6\text{H}_4\text{F})_3)\text{Cl}][\text{BArF}_{24}]$ .         | S33 |
| S28  | $\%V_{\text{bur}}$ calculation for the dfurpf ligand in $[\text{Pd}(\text{dfurpf})(\text{P}(p\text{-C}_6\text{H}_4\text{CF}_3)_3)\text{Cl}][\text{BArF}_{24}]$ .                                          | S34 |
| S29  | $\%V_{\text{bur}}$ calculation for the $\text{P}(p\text{-C}_6\text{H}_4\text{CF}_3)_3$ ligand in $[\text{Pd}(\text{dfurpf})(\text{P}(p\text{-C}_6\text{H}_4\text{CF}_3)_3)\text{Cl}][\text{BArF}_{24}]$ . | S35 |
| S30  | CV scans of 1.0 mM $[\text{Pd}_2(\text{dfurpf})_2(\mu\text{-Cl})_2][\text{BArF}_{24}]_2$ with 0.1 M                                                                                                       | S36 |

|     |                                                                                                                                                                                                                                                       |     |
|-----|-------------------------------------------------------------------------------------------------------------------------------------------------------------------------------------------------------------------------------------------------------|-----|
|     | [NBu <sub>4</sub> ][PF <sub>6</sub> ] as the supporting electrolyte measured at 100 mV s <sup>-1</sup> .                                                                                                                                              |     |
| S31 | CV scan of 1.0 mM [Pd(dippf)(PMe <sub>3</sub> )Cl][BArF <sub>24</sub> ] with 0.1 M [NBu <sub>4</sub> ][PF <sub>6</sub> ] as the supporting electrolyte measured at 100 mV s <sup>-1</sup> .                                                           | S37 |
| S32 | CV scan of 1.0 mM [Pd(dippf)(PPh <sub>3</sub> )Cl][BArF <sub>24</sub> ] with 0.1 M [NBu <sub>4</sub> ][PF <sub>6</sub> ] as the supporting electrolyte measured at 100 mV s <sup>-1</sup> .                                                           | S38 |
| S33 | CV scan of 1.0 mM [Pd(dippf)(PPh <sub>2</sub> Fc)Cl][BArF <sub>24</sub> ] with 0.1 M [NBu <sub>4</sub> ][PF <sub>6</sub> ] as the supporting electrolyte measured at 100 mV s <sup>-1</sup> .                                                         | S39 |
| S34 | CV scan of 1.0 mM [Pd(dppdtbpf)(PMe <sub>3</sub> )Cl][BArF <sub>24</sub> ] with 0.1 M [NBu <sub>4</sub> ][PF <sub>6</sub> ] as the supporting electrolyte measured at 100 mV s <sup>-1</sup> .                                                        | S40 |
| S35 | CV scan of 1.0 mM [Pd(dppdtbpf)(PPh <sub>3</sub> )Cl][BArF <sub>24</sub> ] with 0.1 M [NBu <sub>4</sub> ][PF <sub>6</sub> ] as the supporting electrolyte measured at 100 mV s <sup>-1</sup> .                                                        | S41 |
| S36 | CV scan of 1.0 mM [Pd(dppdtbpf)(PPh <sub>2</sub> Fc)Cl][BArF <sub>24</sub> ] with 0.1 M [NBu <sub>4</sub> ][PF <sub>6</sub> ] as the supporting electrolyte measured at 100 mV s <sup>-1</sup> .                                                      | S42 |
| S37 | CV scan of 1.0 mM [Pd(dcpf)(PMe <sub>3</sub> )Cl][BArF <sub>24</sub> ] with 0.1 M [NBu <sub>4</sub> ][PF <sub>6</sub> ] as the supporting electrolyte measured at 100 mV s <sup>-1</sup> .                                                            | S43 |
| S38 | CV scan of 1.0 mM [Pd(dfurpf)(PMe <sub>3</sub> )Cl][BArF <sub>24</sub> ] with 0.1 M [NBu <sub>4</sub> ][PF <sub>6</sub> ] as the supporting electrolyte measured at 100 mV s <sup>-1</sup> .                                                          | S44 |
| S39 | CV scan of 1.0 mM [Pd(dfurpf)(PPh <sub>3</sub> )Cl][BArF <sub>24</sub> ] with 0.1 M [NBu <sub>4</sub> ][PF <sub>6</sub> ] as the supporting electrolyte measured at 100 mV s <sup>-1</sup> .                                                          | S45 |
| S40 | CV scan of 1.0 mM [Pd(dppf)(P(NMe <sub>2</sub> ) <sub>3</sub> )Cl][BArF <sub>24</sub> ] with 0.1 M [NBu <sub>4</sub> ][PF <sub>6</sub> ] as the supporting electrolyte measured at 100 mV s <sup>-1</sup> .                                           | S46 |
| S41 | CV scan of 1.0 mM [Pd(dppf)(P(CH <sub>2</sub> Ph) <sub>3</sub> )Cl][BArF <sub>24</sub> ] with 0.1 M [NBu <sub>4</sub> ][PF <sub>6</sub> ] as the supporting electrolyte measured at 100 mV s <sup>-1</sup> .                                          | S47 |
| S42 | CV scan of 1.0 mM [Pd(dppf)(P( <i>m</i> -tol) <sub>3</sub> )Cl][BArF <sub>24</sub> ] with 0.1 M [NBu <sub>4</sub> ][PF <sub>6</sub> ] as the supporting electrolyte measured at 100 mV s <sup>-1</sup> .                                              | S48 |
| S43 | CV scan of 1.0 mM [Pd(dppf)(P( <i>p</i> -tol) <sub>3</sub> )Cl][BArF <sub>24</sub> ] with 0.1 M [NBu <sub>4</sub> ][PF <sub>6</sub> ] as the supporting electrolyte measured at 100 mV s <sup>-1</sup> .                                              | S49 |
| S44 | CV scan of 1.0 mM [Pd(dppf)(P( <i>p</i> -C <sub>6</sub> H <sub>4</sub> OMe) <sub>3</sub> )Cl][BArF <sub>24</sub> ] with 0.1 M [NBu <sub>4</sub> ][PF <sub>6</sub> ] as the supporting electrolyte measured at 100 mV s <sup>-1</sup> .                | S50 |
| S45 | CV scan of 1.0 mM [Pd(dppf)(P( <i>p</i> -C <sub>6</sub> H <sub>4</sub> F) <sub>3</sub> )Cl][BArF <sub>24</sub> ] with 0.1 M [NBu <sub>4</sub> ][PF <sub>6</sub> ] as the supporting electrolyte measured at 100 mV s <sup>-1</sup> .                  | S51 |
| S46 | CV scan of 1.0 mM [Pd(dfurpf)(P( <i>p</i> -C <sub>6</sub> H <sub>4</sub> CF <sub>3</sub> ) <sub>3</sub> )Cl][BArF <sub>24</sub> ] with 0.1 M [NBu <sub>4</sub> ][PF <sub>6</sub> ] as the supporting electrolyte measured at 100 mV s <sup>-1</sup> . | S52 |

---

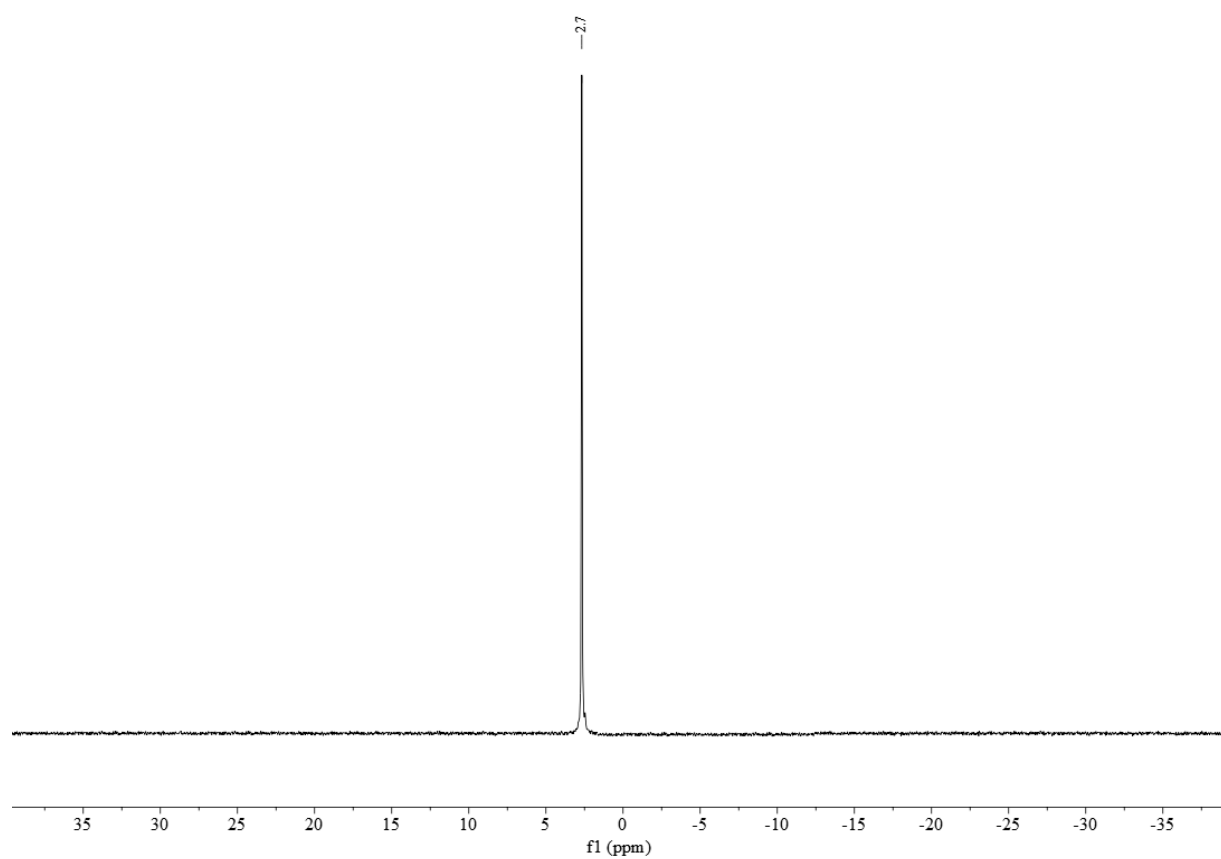

**Fig. S1.**  $^{31}\text{P}\{^1\text{H}\}$  NMR spectrum of  $[\text{Pd}_2(\text{dfurpf})_2(\mu\text{-Cl})_2][\text{BARF}_{24}]_2$  in  $\text{CD}_2\text{Cl}_2$ .

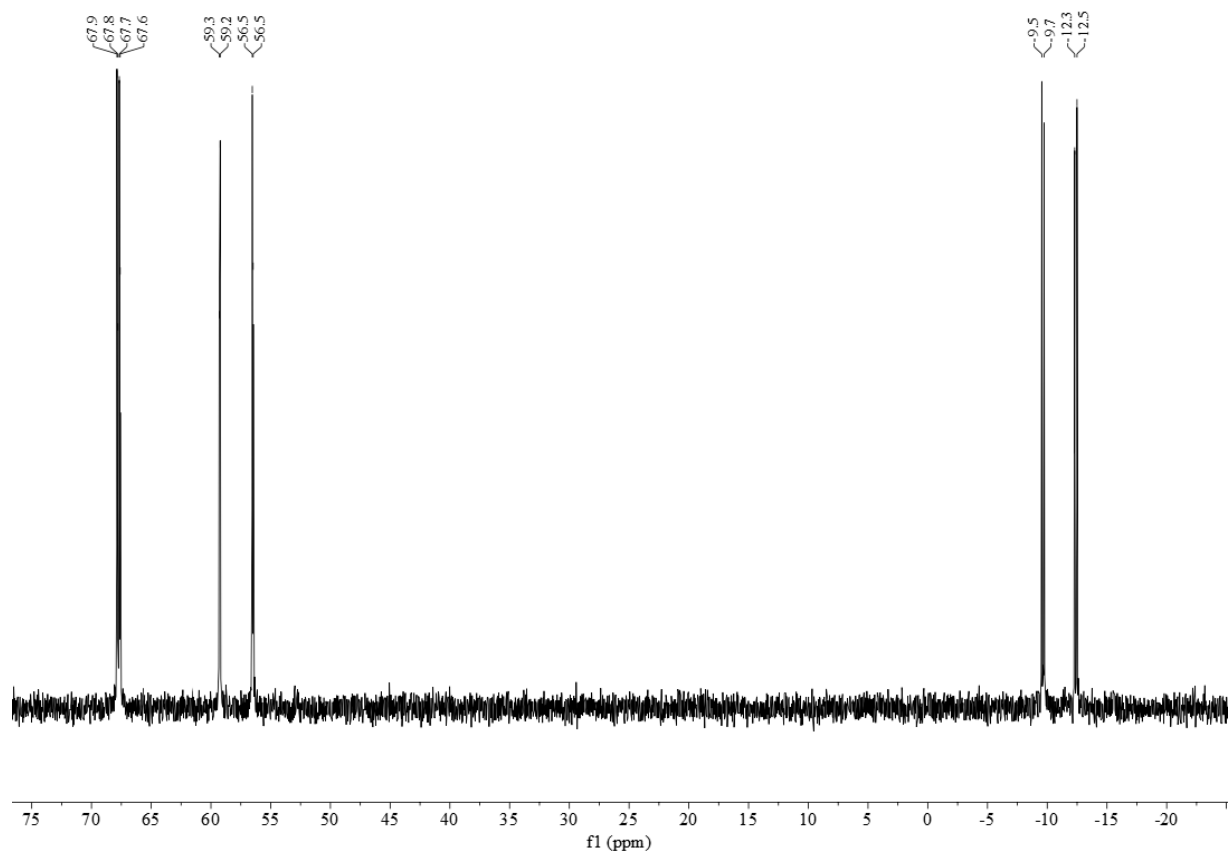

**Fig. S2.**  $^{31}\text{P}\{^1\text{H}\}$  NMR spectrum of  $[\text{Pd}(\text{dippf})(\text{PMe}_3)\text{Cl}][\text{BArF}_{24}]$  in  $\text{CD}_2\text{Cl}_2$ .



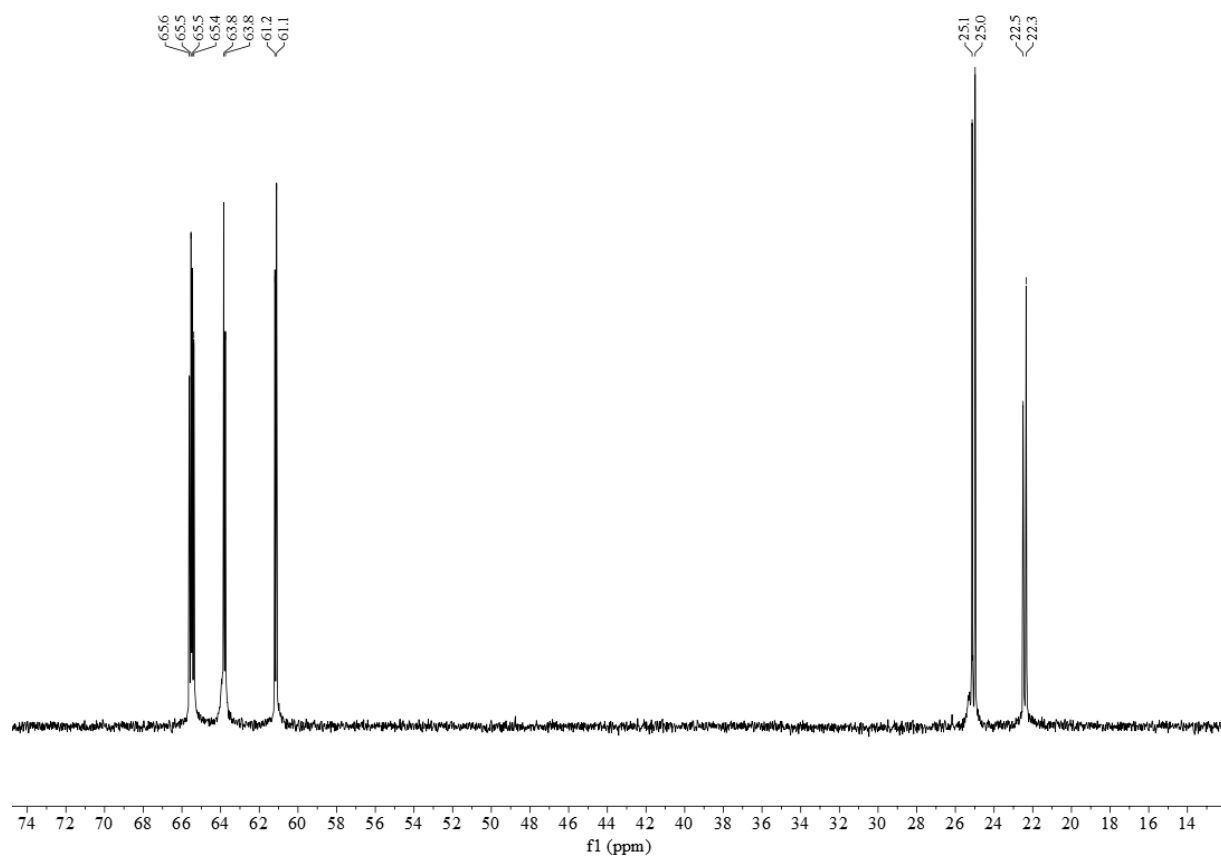

**Fig. S3.**  $^{31}\text{P}\{^1\text{H}\}$  NMR spectrum of  $[\text{Pd}(\text{dippf})(\text{PPh}_3)\text{Cl}][\text{BArF}_{24}]$  in  $\text{CD}_2\text{Cl}_2$ .

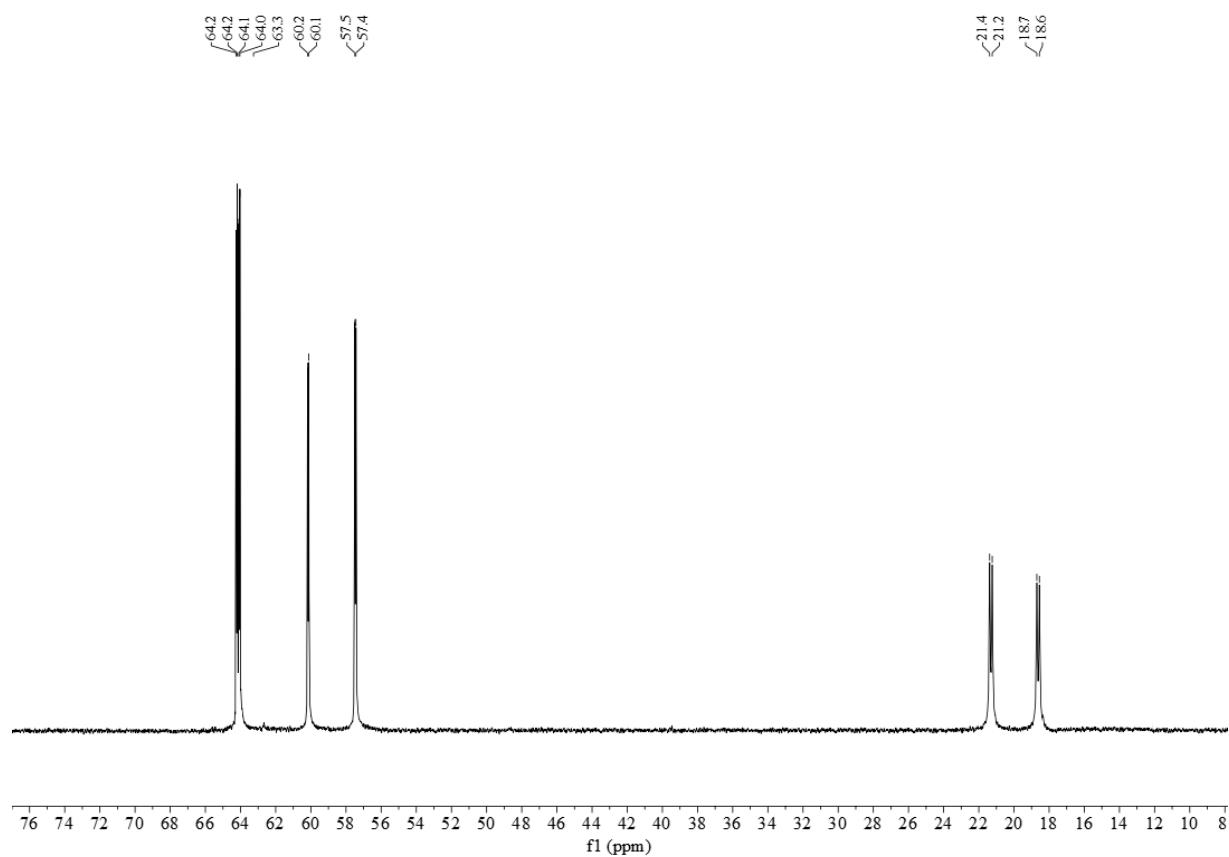

**Fig. S4.**  $^{31}\text{P}\{^1\text{H}\}$  NMR spectrum of  $[\text{Pd}(\text{dippf})(\text{PPh}_2\text{Fc})\text{Cl}][\text{BArF}_{24}]$  in  $\text{CD}_2\text{Cl}_2$ .

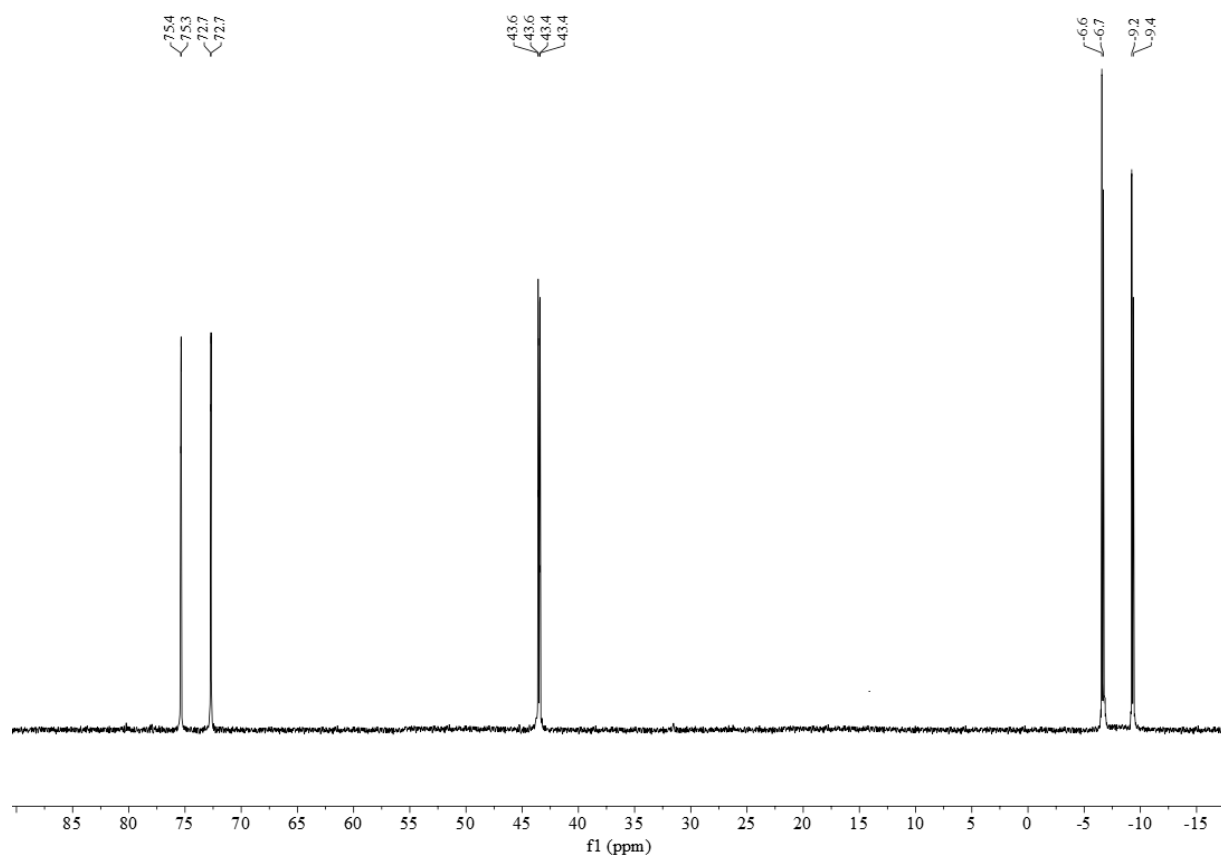

**Fig. S5.**  $^{31}\text{P}\{^1\text{H}\}$  NMR spectrum of  $[\text{Pd}(\text{dppdtbpf})(\text{PMe}_3)\text{Cl}][\text{BArF}_{24}]$  in  $\text{CD}_2\text{Cl}_2$ .

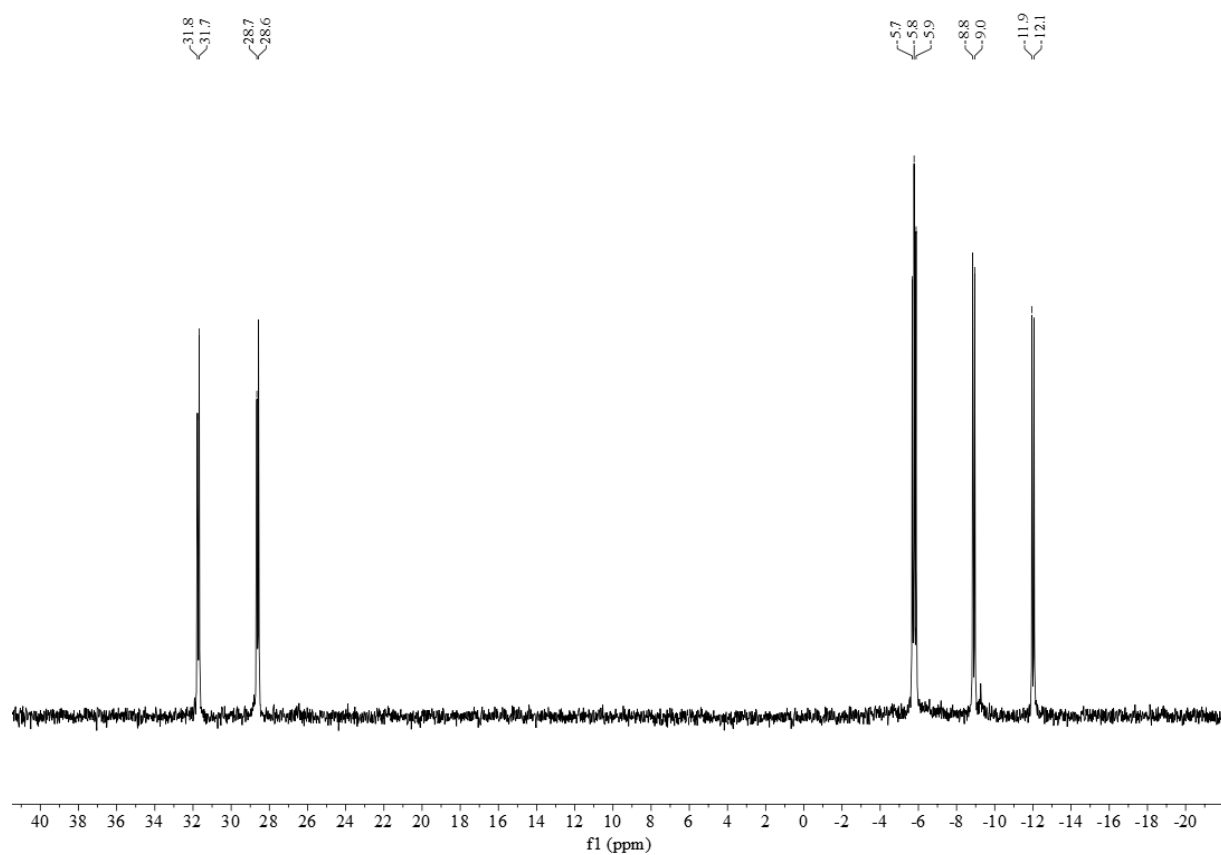

**Fig. S6.**  $^{31}\text{P}\{^1\text{H}\}$  NMR spectrum of  $[\text{Pd}(\text{dppdtbpf})(\text{PPh}_2\text{Fc})\text{Cl}][\text{BArF}_{24}]$  in  $\text{CD}_2\text{Cl}_2$ .

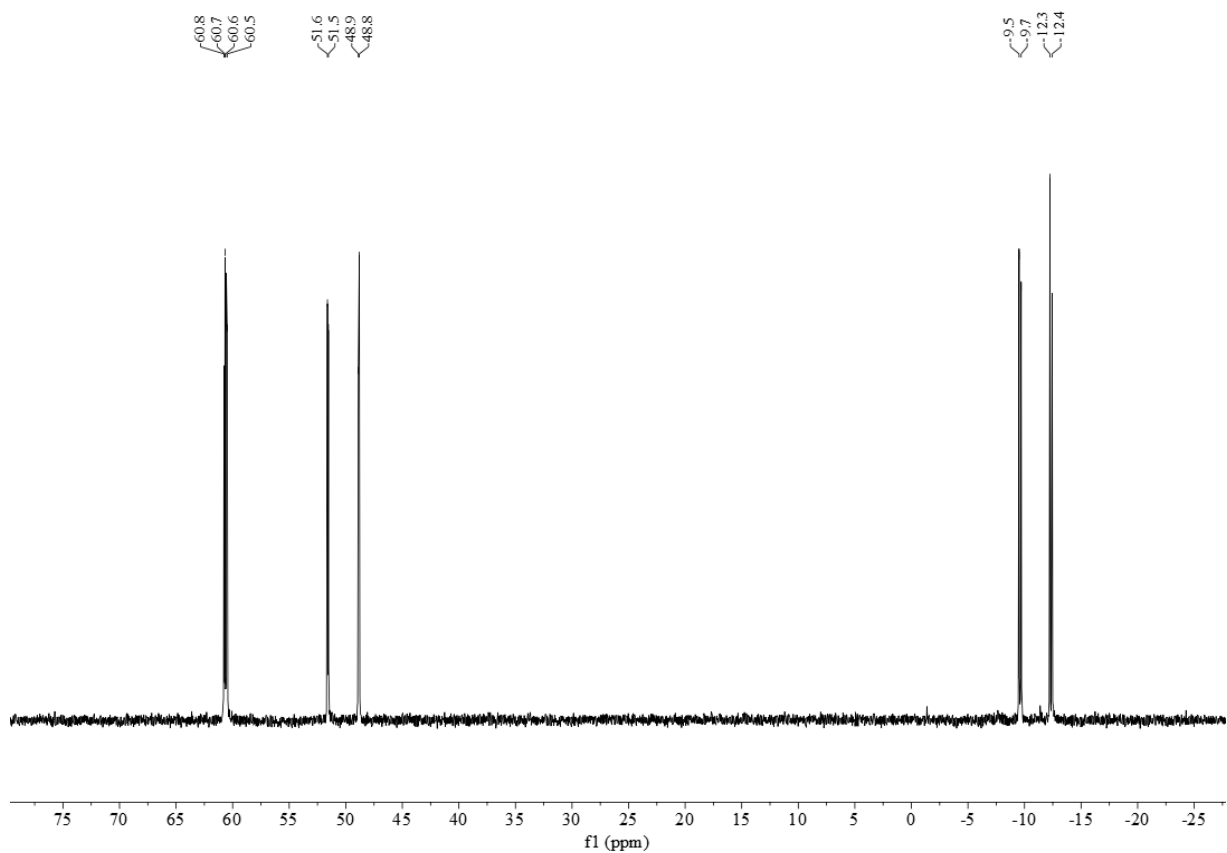

**Fig. S7.**  $^{31}\text{P}\{^1\text{H}\}$  NMR spectrum of  $[\text{Pd}(\text{dcpf})(\text{PMe}_3)\text{Cl}][\text{BArF}_{24}]$  in  $\text{CD}_2\text{Cl}_2$ .

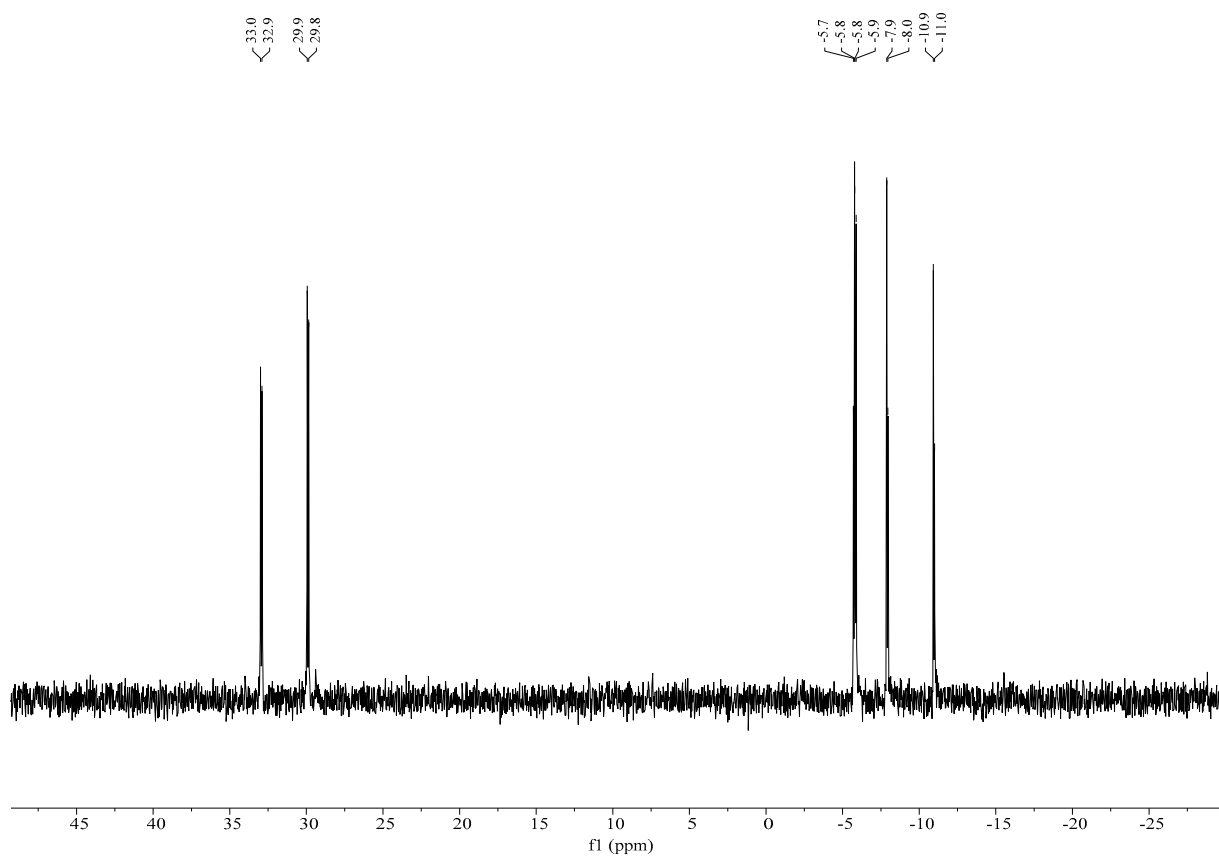

**Fig. S8.**  $^{31}\text{P}\{^1\text{H}\}$  NMR spectrum of  $[\text{Pd}(\text{dfurpf})(\text{PMe}_3)\text{Cl}][\text{BArF}_{24}]$  in  $\text{CDCl}_3$ .

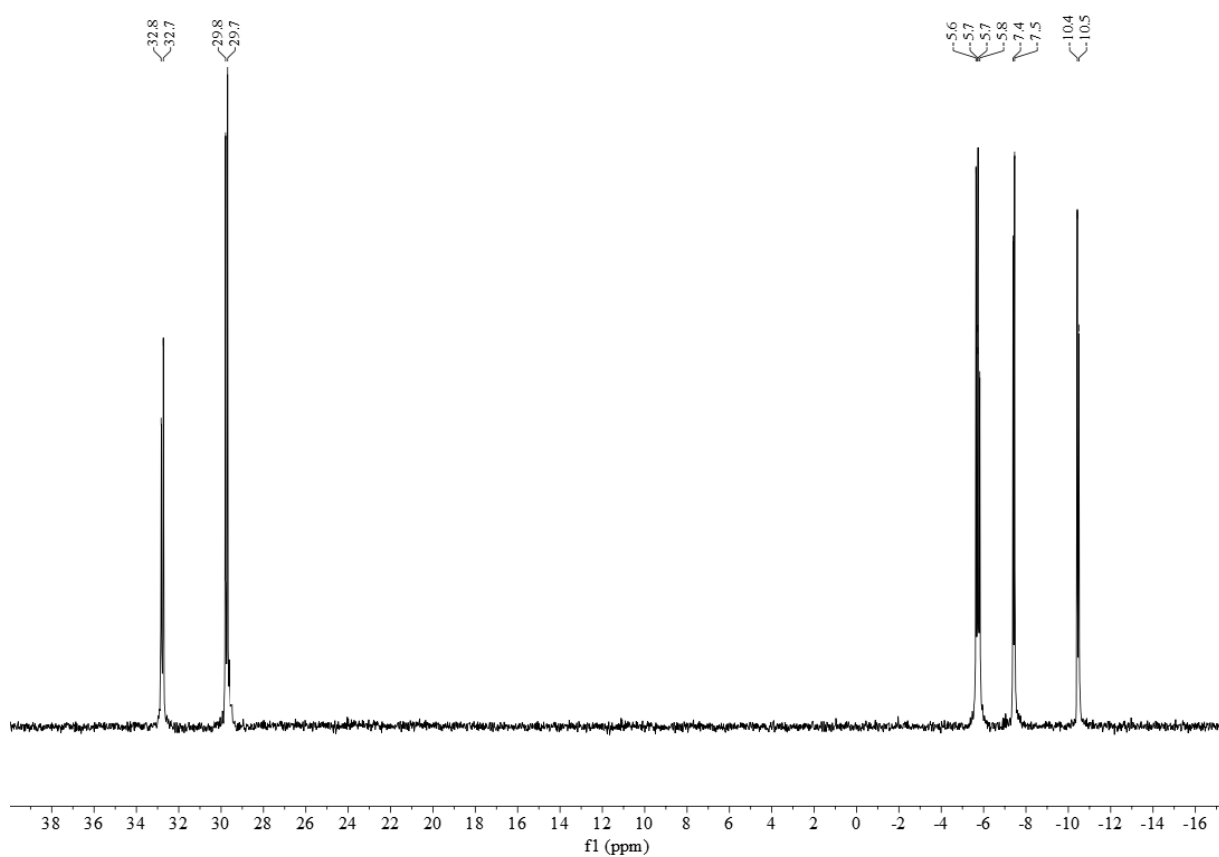

**Fig. S9.**  $^{31}\text{P}\{^1\text{H}\}$  NMR spectrum of  $[\text{Pd}(\text{dfurpf})(\text{PPh}_3)\text{Cl}][\text{BArF}_{24}]$  in  $\text{CD}_2\text{Cl}_2$ .

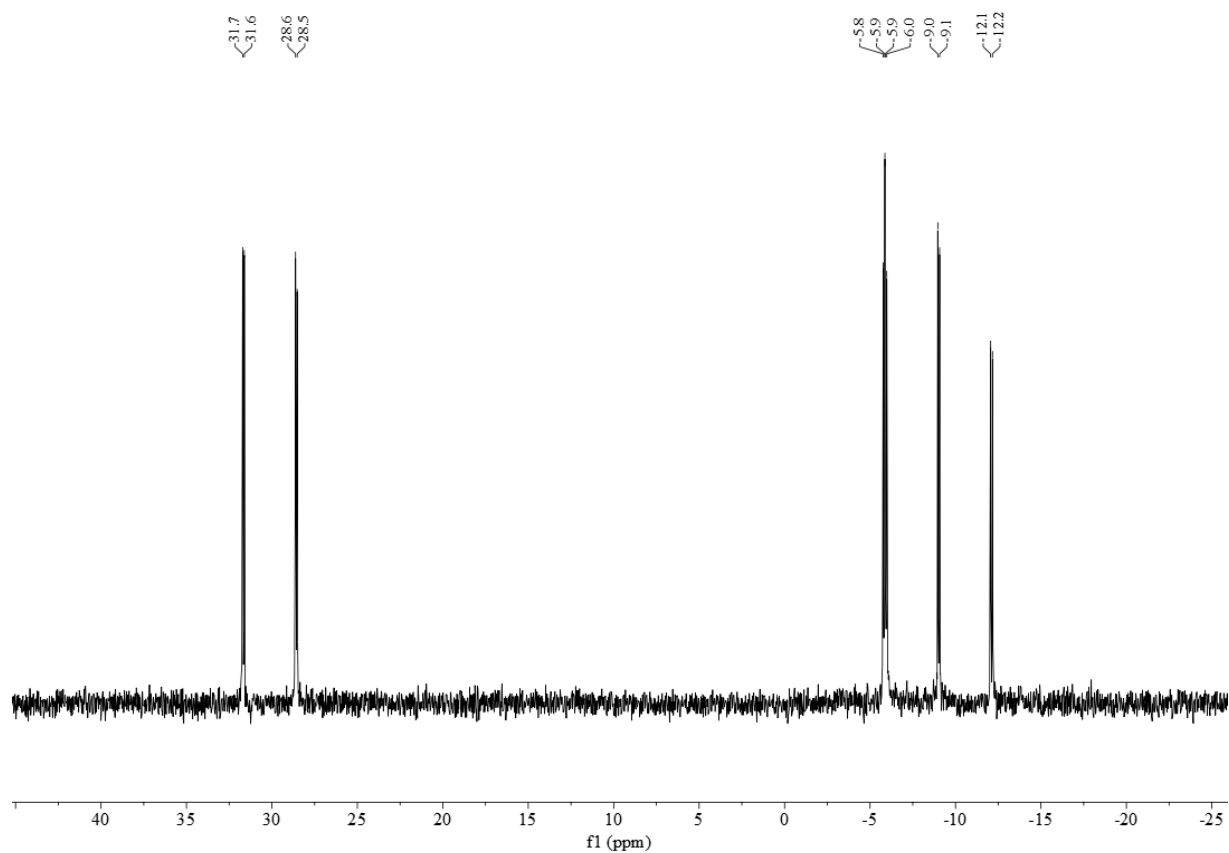

**Fig. S10.**  $^{31}\text{P}\{^1\text{H}\}$  NMR spectrum of  $[\text{Pd}(\text{dfurpf})(\text{PPh}_2\text{Fc})\text{Cl}][\text{BArF}_{24}]$  in  $\text{CD}_2\text{Cl}_2$ .



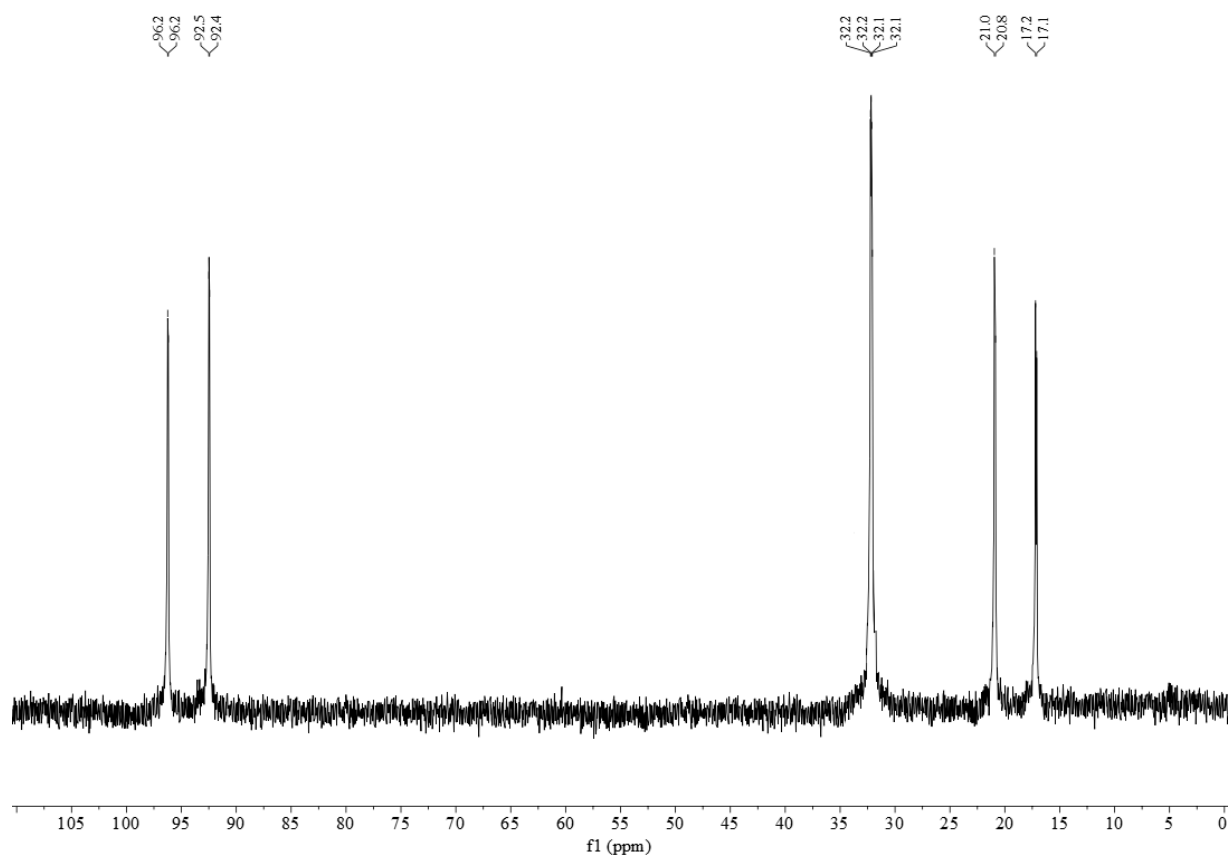

**Fig. S11.**  $^{31}\text{P}\{^1\text{H}\}$  NMR spectrum of  $[\text{Pd}(\text{dppf})(\text{P}(\text{NMe}_2)_3)\text{Cl}][\text{BArF}_{24}]$  in  $\text{CD}_2\text{Cl}_2$ .

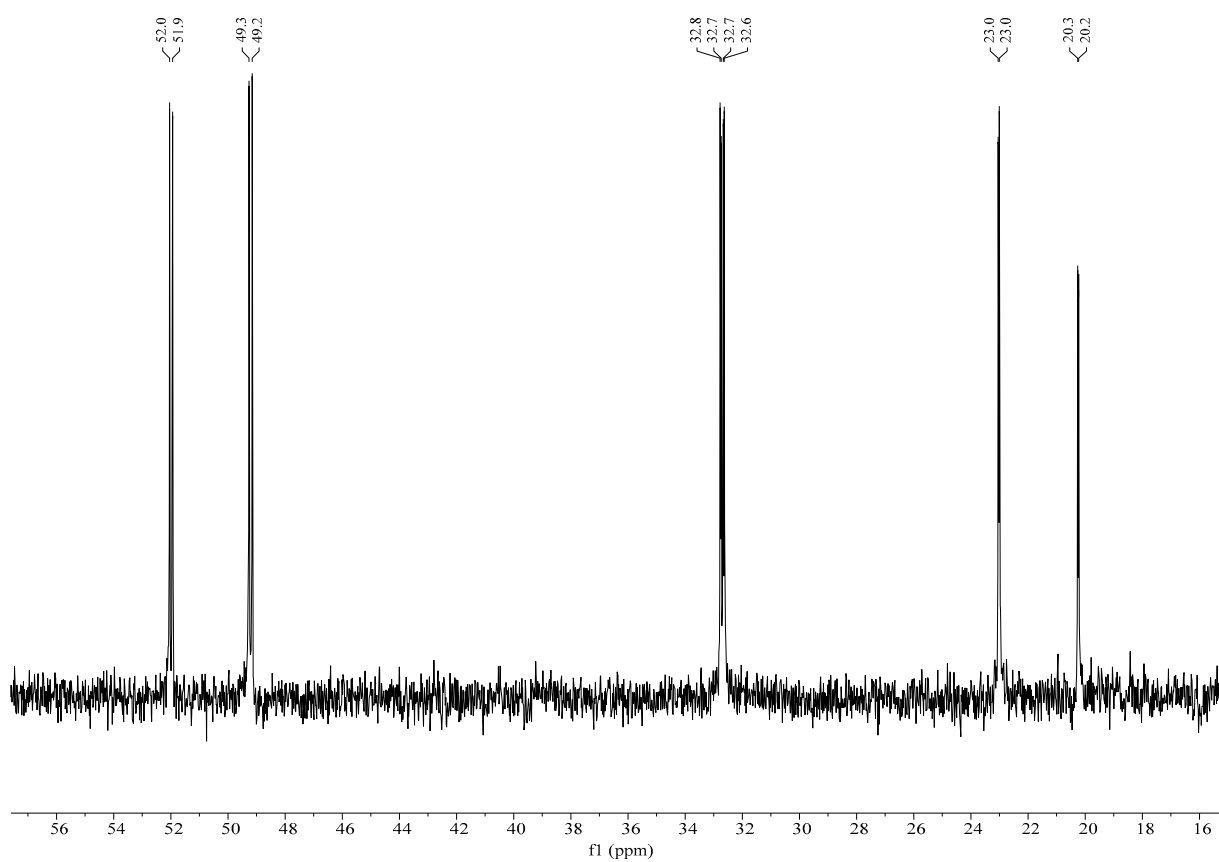

**Fig. S12.**  $^{31}\text{P}\{^1\text{H}\}$  NMR spectrum of  $[\text{Pd}(\text{dppf})(\text{P}^i\text{Pr}_3)\text{Cl}][\text{BArF}_{24}]$  in  $\text{CD}_2\text{Cl}_2$ .

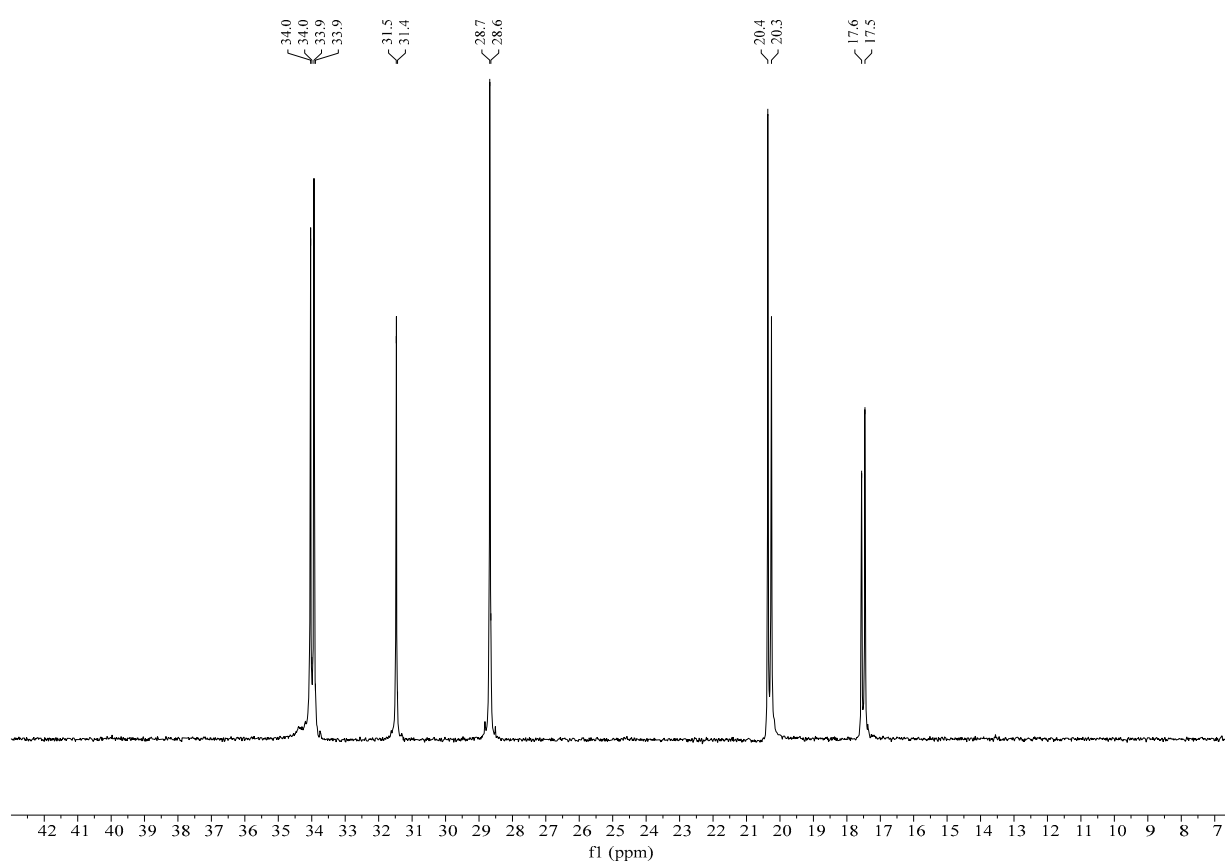

**Fig. S13.**  $^{31}\text{P}\{^1\text{H}\}$  NMR spectrum of  $[\text{Pd}(\text{dppf})(\text{P}(\text{CH}_2\text{Ph})_3)\text{Cl}][\text{BArF}_{24}]$  in  $\text{CD}_2\text{Cl}_2$ .

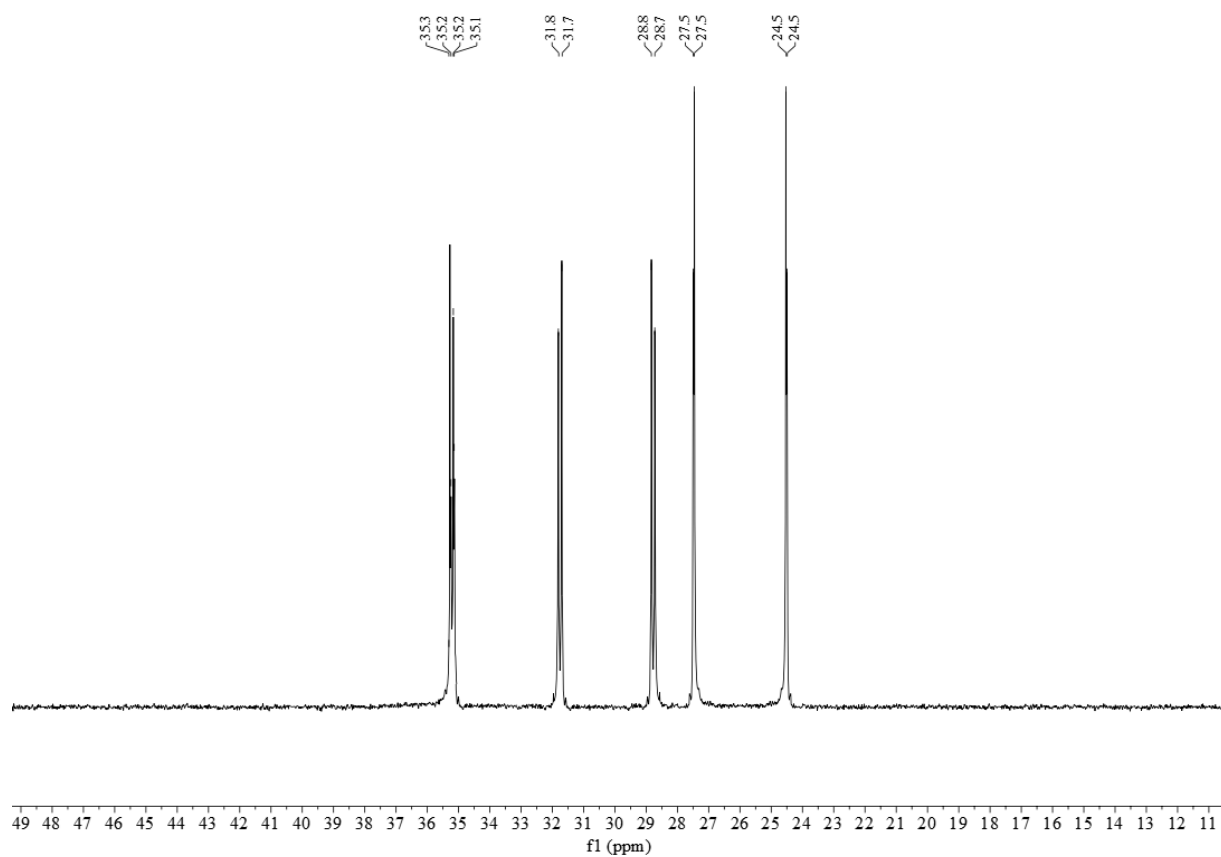

**Fig. S14.**  $^{31}\text{P}\{^1\text{H}\}$  NMR spectrum of  $[\text{Pd}(\text{dppf})(\text{P}(m\text{-tol})_3)\text{Cl}][\text{BArF}_{24}]$  in  $\text{CD}_2\text{Cl}_2$ .

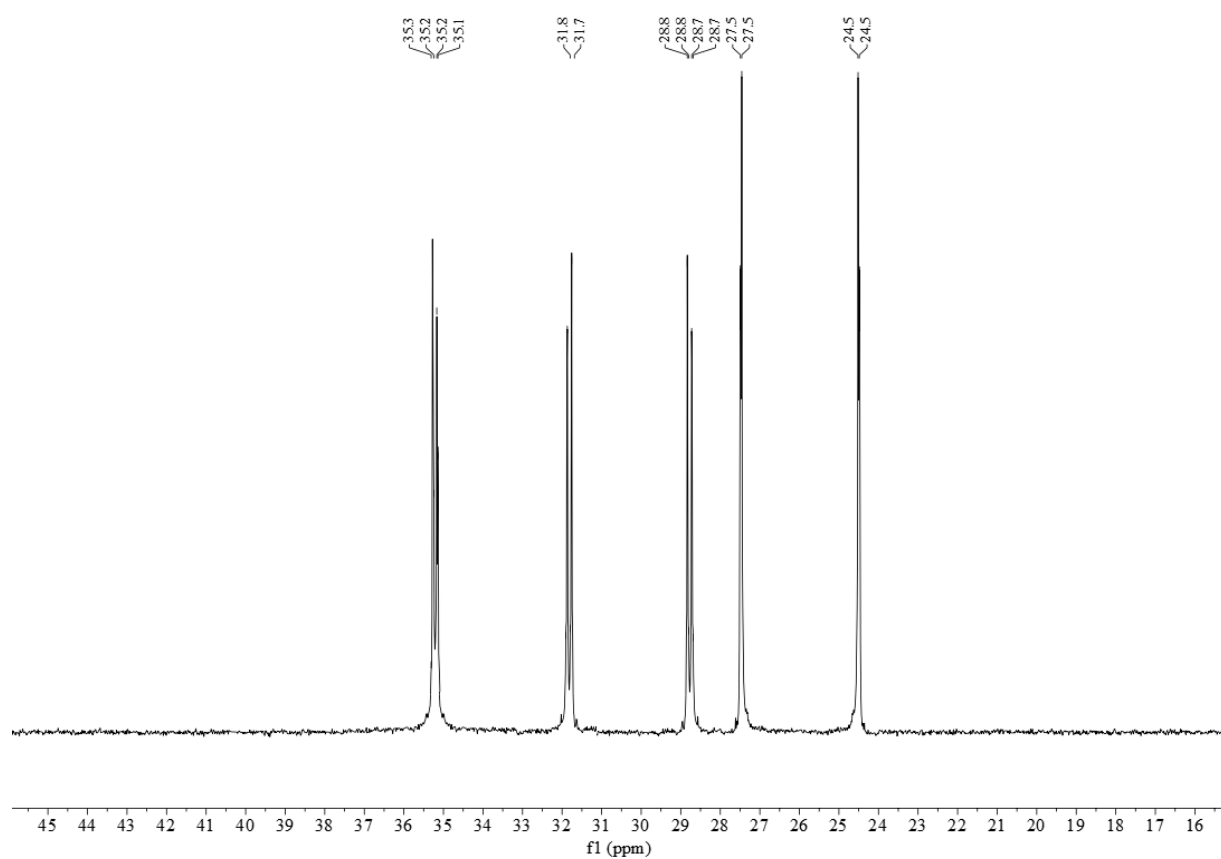

**Fig. S15.**  $^{31}\text{P}\{^1\text{H}\}$  NMR spectrum of  $[\text{Pd}(\text{dppf})(\text{P}(p\text{-tol})_3)\text{Cl}][\text{BArF}_{24}]$  in  $\text{CD}_2\text{Cl}_2$ .

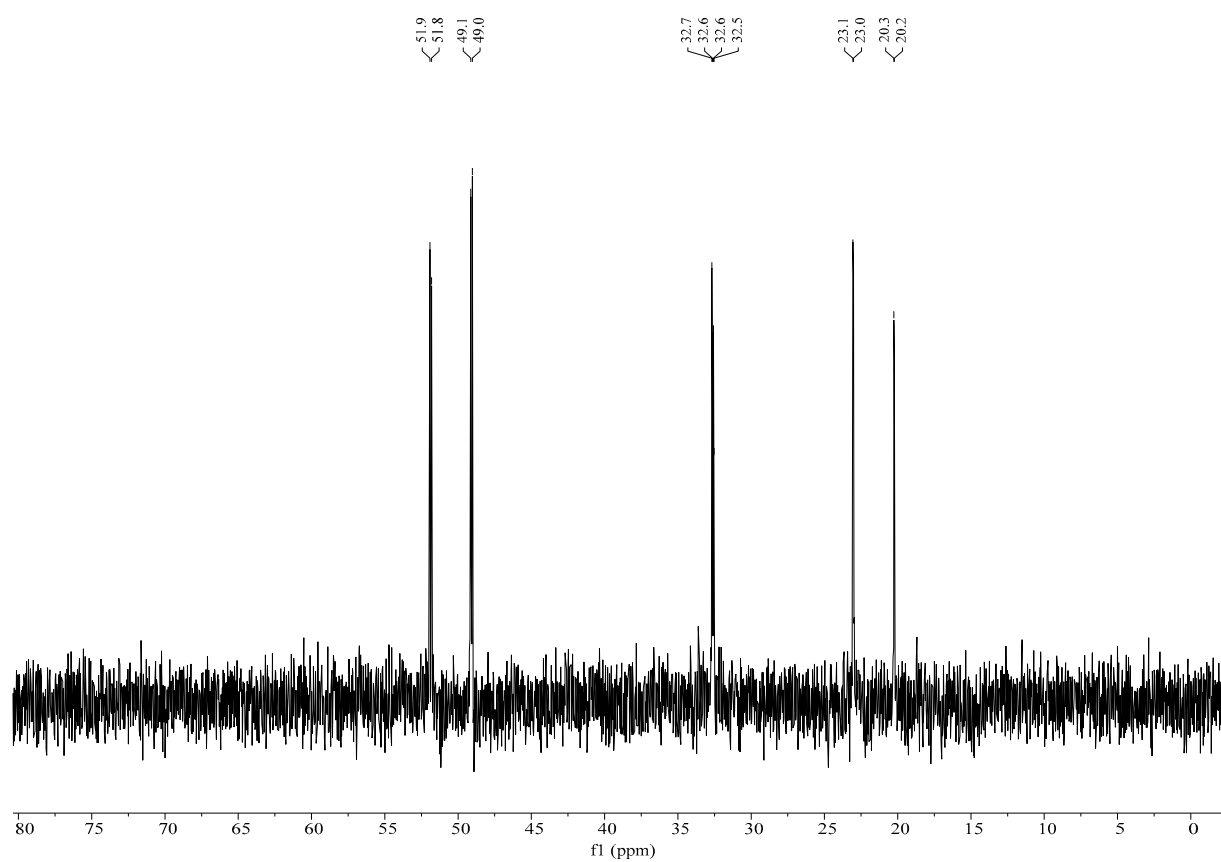

**Fig. S16.**  $^{31}\text{P}\{^1\text{H}\}$  NMR spectrum of  $[\text{Pd}(\text{dppf})(\text{P}(p\text{-C}_6\text{H}_4\text{OMe})_3)\text{Cl}][\text{BArF}_{24}]$  in  $\text{CD}_2\text{Cl}_2$ .

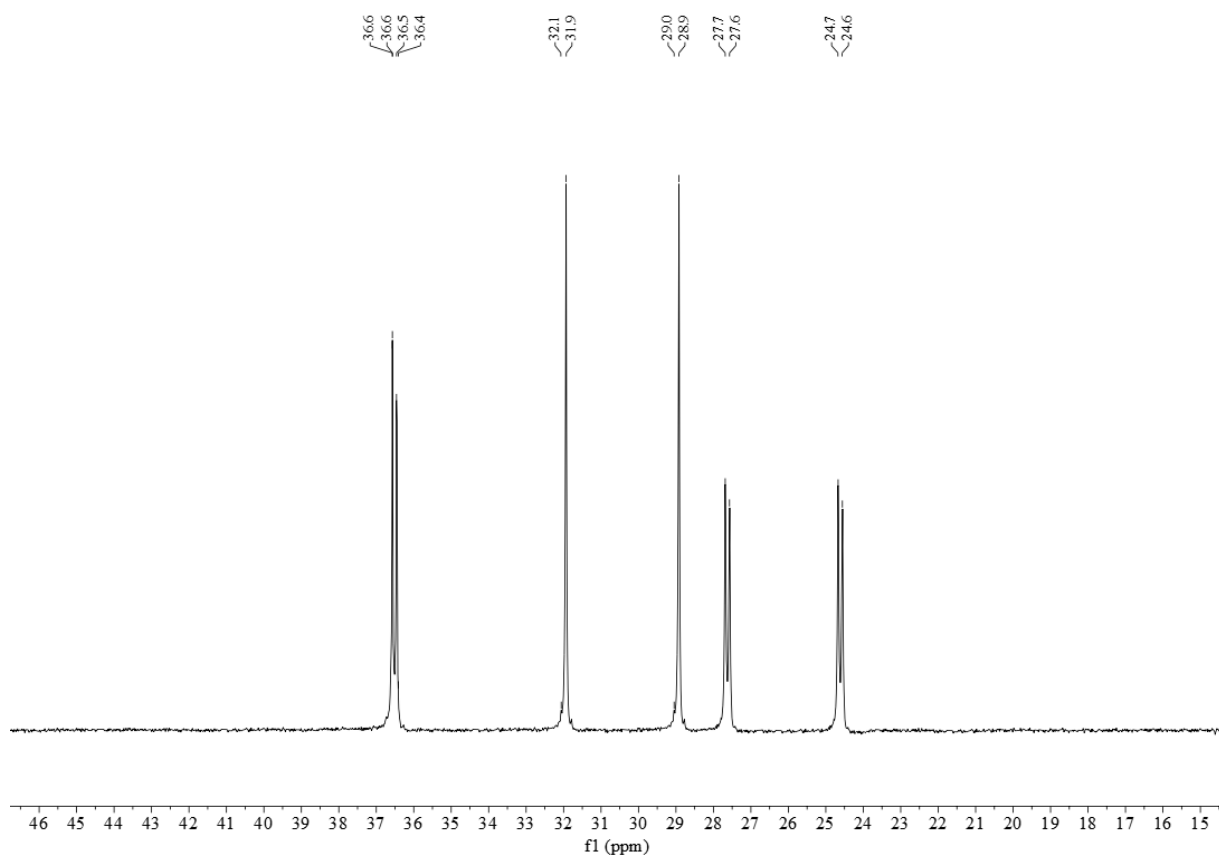

**Fig. S17.**  $^{31}\text{P}\{^1\text{H}\}$  NMR spectrum of  $[\text{Pd}(\text{dppf})(\text{P}(p\text{-C}_6\text{H}_4\text{F})_3)\text{Cl}][\text{BARF}_{24}]$  in  $\text{CD}_2\text{Cl}_2$ .

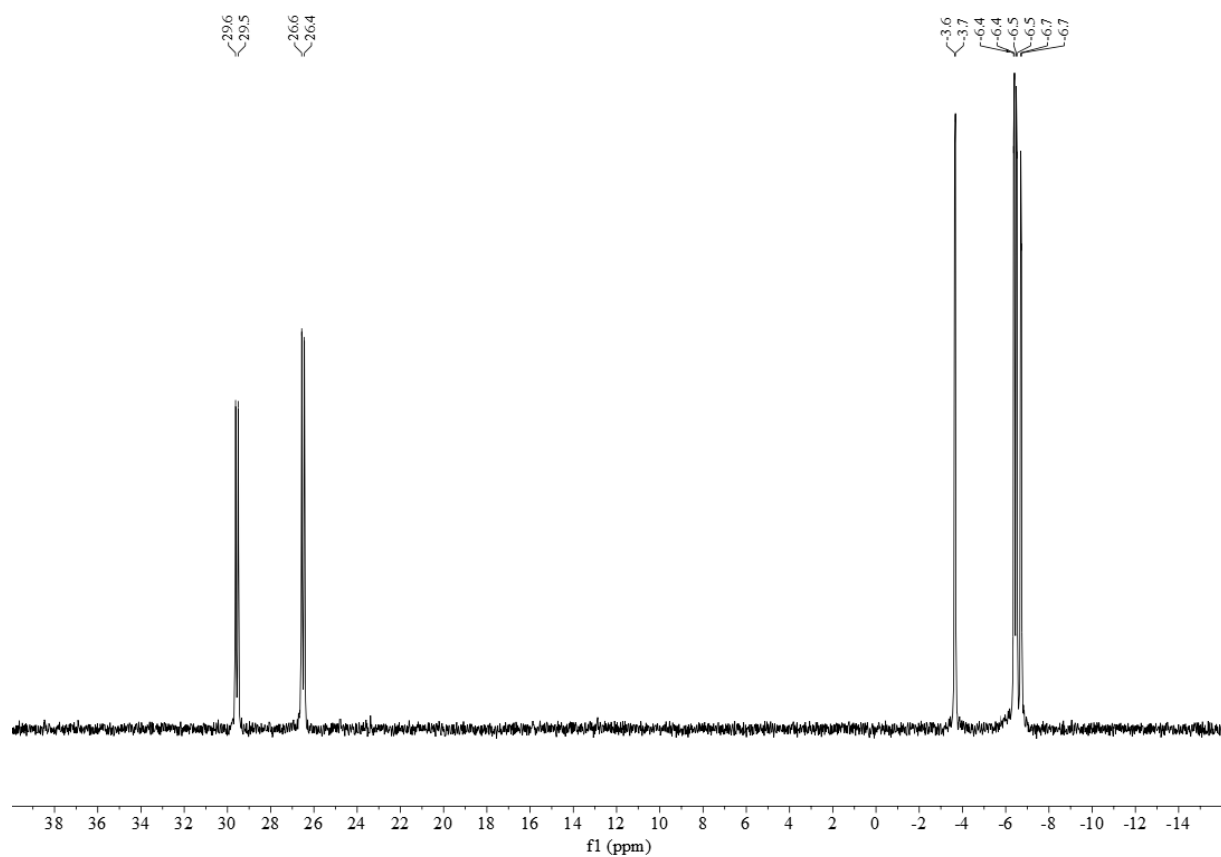

**Fig. S18.**  $^{31}\text{P}\{^1\text{H}\}$  NMR spectrum of  $[\text{Pd}(\text{dfurpf})(\text{P}(p\text{-C}_6\text{H}_4\text{CF}_3)_3)\text{Cl}][\text{BArF}_{24}]$  in  $\text{CD}_2\text{Cl}_2$ .



**Table S1.**

Crystal data and structure analysis results.

|                           | <b>[Pd<sub>2</sub>(dppdtbpf)<sub>2</sub>(μ-Cl)<sub>2</sub>][BArF<sub>24</sub>]<sub>2</sub></b>                                 |
|---------------------------|--------------------------------------------------------------------------------------------------------------------------------|
| formula                   | C <sub>124</sub> H <sub>96</sub> B <sub>2</sub> Cl <sub>2</sub> F <sub>48</sub> Fe <sub>2</sub> P <sub>4</sub> Pd <sub>2</sub> |
| fw                        | 3293.68                                                                                                                        |
| crystal system            | triclinic                                                                                                                      |
| space group               | P $\bar{1}$                                                                                                                    |
| <i>a</i> , Å              | 13.3640(4)                                                                                                                     |
| <i>b</i> , Å              | 14.1731(4)                                                                                                                     |
| <i>c</i> , Å              | 18.8640(5)                                                                                                                     |
| $\alpha$ , deg            | 107.137(2)                                                                                                                     |
| $\beta$ , deg             | 99.478(2)                                                                                                                      |
| $\gamma$ , deg            | 95.132(2)                                                                                                                      |
| <i>V</i> , Å <sup>3</sup> | 3331.50(17)                                                                                                                    |
| <i>Z</i>                  | 1                                                                                                                              |
| cryst. size, mm           | 0.37 x 0.25 x 0.14                                                                                                             |
| cryst. color              | Green-brown                                                                                                                    |
| radiation                 | 0.71073                                                                                                                        |
| temp, K                   | 101.15                                                                                                                         |
| 2 $\theta$ range, deg     | 4.356-61.194                                                                                                                   |
| data collected            |                                                                                                                                |
| <i>h</i>                  | -19 to 19                                                                                                                      |
| <i>k</i>                  | -19 to 20                                                                                                                      |
| <i>l</i>                  | -26 to 26                                                                                                                      |
| no. of data collected     | 90876                                                                                                                          |
| no. of unique data        | 19504                                                                                                                          |
| abs. corr                 | SCALE3 ABSPACK                                                                                                                 |
| final <i>R</i> indices    |                                                                                                                                |
| <i>R</i> 1                | 0.0447                                                                                                                         |
| <i>wR</i> 2               | 0.0977                                                                                                                         |
| goodness of fit           | 1.026                                                                                                                          |

**Table S2.**

Crystal data and structure analysis results for monodentate alkyl phoshines.

|                           | <b>[Pd(dippf)(PMe<sub>3</sub>)Cl][BArF<sub>24</sub>]</b>                                                                        | <b>[Pd(dcpf)(PMe<sub>3</sub>)Cl][BArF<sub>24</sub>]</b>                | <b>[Pd(dppf)(P<sup><i>i</i></sup>Pr<sub>3</sub>)Cl][BArF<sub>24</sub>]</b>           |
|---------------------------|---------------------------------------------------------------------------------------------------------------------------------|------------------------------------------------------------------------|--------------------------------------------------------------------------------------|
| formula                   | C <sub>114</sub> H <sub>114</sub> B <sub>2</sub> Cl <sub>2</sub> F <sub>48</sub> Fe <sub>2</sub> P <sub>6</sub> Pd <sub>2</sub> | C <sub>69</sub> H <sub>73</sub> BClF <sub>24</sub> FeP <sub>3</sub> Pd | C <sub>76</sub> H <sub>63</sub> BCl <sub>3</sub> F <sub>24</sub> FeP <sub>3</sub> Pd |
| fw                        | 2998.89                                                                                                                         | 1786.85                                                                | 1889.51                                                                              |
| crystal system            | monoclinic                                                                                                                      | triclinic                                                              | triclinic                                                                            |
| space group               | P2 <sub>1</sub> /n                                                                                                              | P $\bar{1}$                                                            | P $\bar{1}$                                                                          |
| <i>a</i> , Å              | 18.8630(5)                                                                                                                      | 14.5144(5)                                                             | 13.7811(2)                                                                           |
| <i>b</i> , Å              | 17.1402(5)                                                                                                                      | 14.9919(4)                                                             | 16.8393(3)                                                                           |
| <i>c</i> , Å              | 19.2625(7)                                                                                                                      | 18.4885(6)                                                             | 19.0527(3)                                                                           |
| $\alpha$ , deg            | 90                                                                                                                              | 105.066(3)                                                             | 110.586(2)                                                                           |
| $\beta$ , deg             | 94.472(3)                                                                                                                       | 105.113(3)                                                             | 107.341(2)                                                                           |
| $\gamma$ , deg            | 90                                                                                                                              | 94.469(3)                                                              | 91.4480(10)                                                                          |
| <i>V</i> , Å <sup>3</sup> | 6208.9(3)                                                                                                                       | 3704.3(2)                                                              | 3908.90(13))                                                                         |
| <i>Z</i>                  | 2                                                                                                                               | 2                                                                      | 2                                                                                    |
| cryst. size, mm           | 0.44 x 0.40 x 0.16                                                                                                              | 0.21 x 0.15 x 0.09                                                     | 0.50 x 0.24 x 0.12                                                                   |
| cryst. color              | Orange                                                                                                                          | Orange                                                                 | Orange                                                                               |
| radiation                 | 0.71073                                                                                                                         | 0.71073                                                                | 0.71073                                                                              |
| temp, K                   | 100.15                                                                                                                          | 99.97(11)                                                              | 99.9(7)                                                                              |
| 2 $\theta$ range, deg     | 4.242-51.998                                                                                                                    | 4.214-61.226                                                           | 4.548-61.292                                                                         |
| data collected            |                                                                                                                                 |                                                                        |                                                                                      |
| <i>h</i>                  | -23 to 23                                                                                                                       | -20 to 20                                                              | -19 to 19                                                                            |
| <i>k</i>                  | -21 to 20                                                                                                                       | -21 to 21                                                              | -24 to 23                                                                            |
| <i>l</i>                  | -23 to 23                                                                                                                       | -26 to 26                                                              | -27 to 27                                                                            |
| no. of data collected     | 40031                                                                                                                           | 104524                                                                 | 115081                                                                               |
| no. of unique data        | 11952                                                                                                                           | 21606                                                                  | 23000                                                                                |
| abs. corr                 | SCALE3 ABSPACK                                                                                                                  | SCALE3 ABSPACK                                                         | SCALE3 ABSPACK                                                                       |
| final <i>R</i> indices    |                                                                                                                                 |                                                                        |                                                                                      |
| R1                        | 0.0342                                                                                                                          | 0.0686                                                                 | 0.0363                                                                               |
| wR2                       | 0.0815                                                                                                                          | 0.1506                                                                 | 0.0867                                                                               |
| goodness of fit           | 1.044                                                                                                                           | 0.984                                                                  | 1.008                                                                                |

**Table S3.**

Crystal data and structure analysis results for monodentate aryl phosphines.

|                           | <b>[Pd(dppf)(P(<i>p</i>-C<sub>6</sub>H<sub>4</sub>F)<sub>3</sub>)Cl][BArF<sub>24</sub>]</b>                                     | <b>[Pd(dfurpf)(P(<i>p</i>-C<sub>6</sub>H<sub>4</sub>CF<sub>3</sub>)<sub>3</sub>)Cl][BArF<sub>24</sub>]</b>                                     |
|---------------------------|---------------------------------------------------------------------------------------------------------------------------------|------------------------------------------------------------------------------------------------------------------------------------------------|
| formula                   | C <sub>168</sub> H <sub>104</sub> B <sub>2</sub> Cl <sub>2</sub> F <sub>54</sub> Fe <sub>2</sub> P <sub>6</sub> Pd <sub>2</sub> | C <sub>168</sub> H <sub>108</sub> B <sub>2</sub> Cl <sub>6</sub> F <sub>66</sub> Fe <sub>2</sub> O <sub>8</sub> P <sub>6</sub> Pd <sub>2</sub> |
| fw                        | 3293.68                                                                                                                         | 4252.80                                                                                                                                        |
| crystal system            | monoclinic                                                                                                                      | triclinic                                                                                                                                      |
| space group               | P2 <sub>1</sub> /c                                                                                                              | P $\bar{1}$                                                                                                                                    |
| <i>a</i> , Å              | 22.2520(11)                                                                                                                     | 10.6072(4)                                                                                                                                     |
| <i>b</i> , Å              | 20.9008(8)                                                                                                                      | 19.0430(7)                                                                                                                                     |
| <i>c</i> , Å              | 18.6833(8)                                                                                                                      | 21.9658(8)                                                                                                                                     |
| $\alpha$ , deg            | 107.137(2)                                                                                                                      | 86.413(3)                                                                                                                                      |
| $\beta$ , deg             | 90                                                                                                                              | 80.154(3)                                                                                                                                      |
| $\gamma$ , deg            | 111.786(5)                                                                                                                      | 83.342(3)                                                                                                                                      |
| <i>V</i> , Å <sup>3</sup> | 90                                                                                                                              | 4338.0(3)                                                                                                                                      |
| <i>Z</i>                  | 2                                                                                                                               | 1                                                                                                                                              |
| cryst. size, mm           | 0.29 x 0.22 x 0.06                                                                                                              | 0.16 x 0.13 x 0.11                                                                                                                             |
| cryst. color              | Orange                                                                                                                          | orange                                                                                                                                         |
| radiation                 | 0.71073                                                                                                                         | 0.71073                                                                                                                                        |
| temp, K                   | 100(2)                                                                                                                          | 100.15                                                                                                                                         |
| 2 $\theta$ range, deg     | 4.24-50                                                                                                                         | 3.92-52                                                                                                                                        |
| data collected            |                                                                                                                                 |                                                                                                                                                |
| <i>h</i>                  | -26 to 26                                                                                                                       | -13 to 13                                                                                                                                      |
| <i>k</i>                  | -24 to 24                                                                                                                       | -23 to 23                                                                                                                                      |
| <i>l</i>                  | -22 to 22                                                                                                                       | -27 to 27                                                                                                                                      |
| no. of data collected     | 88989                                                                                                                           | 96097                                                                                                                                          |
| no. of unique data        | 14216                                                                                                                           | 16896                                                                                                                                          |
| abs. corr                 | SCALE3 ABSPACK                                                                                                                  | SCALE3 ABSPACK                                                                                                                                 |
| final <i>R</i> indices    |                                                                                                                                 |                                                                                                                                                |
| <i>R</i> <sub>1</sub>     | 0.0567                                                                                                                          | 0.0674                                                                                                                                         |
| <i>wR</i> <sub>2</sub>    | 0.1350                                                                                                                          | 0.1284                                                                                                                                         |
| goodness of fit           | 1.012                                                                                                                           | 1.005                                                                                                                                          |

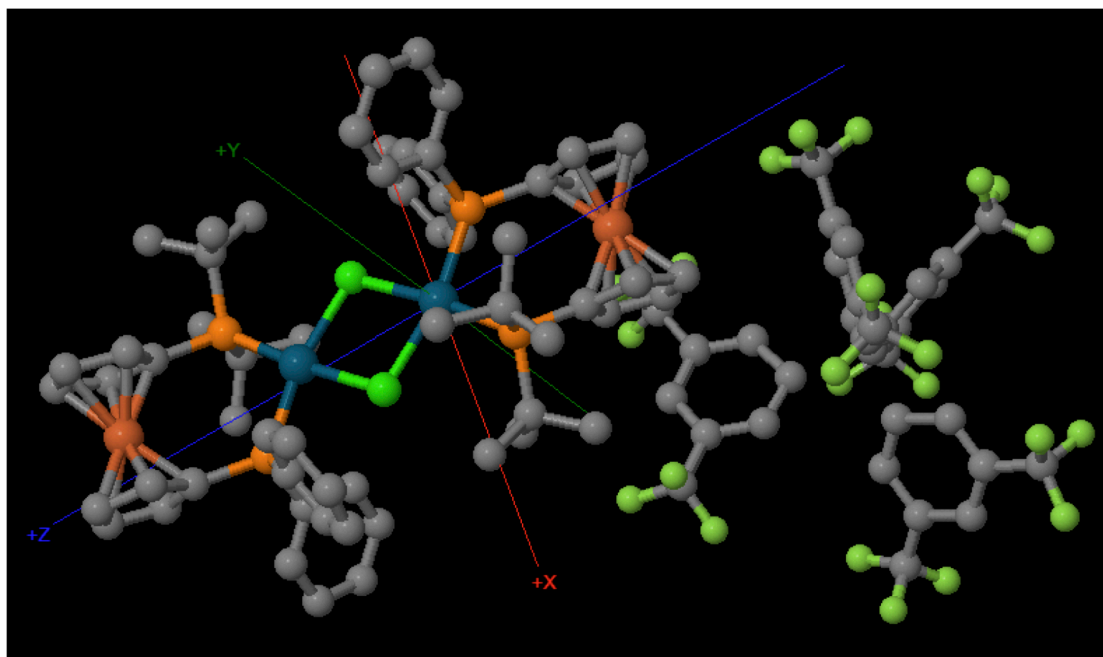

%V Free  
44.0

%V Buried  
60.0

%V tot/V Ex  
99.9

| <u>Quadrant</u> | <u>V f</u> | <u>V b</u> | <u>V t</u> | <u>%V f</u> | <u>%V b</u> |
|-----------------|------------|------------|------------|-------------|-------------|
| SW              | 18.9       | 25.9       | 44.9       | 42.2        | 57.8        |
| NW              | 17.8       | 27.1       | 44.9       | 39.7        | 60.3        |
| NE              | 17.0       | 27.9       | 44.9       | 37.9        | 62.1        |
| SE              | 18.0       | 26.9       | 44.8       | 40.1        | 59.9        |

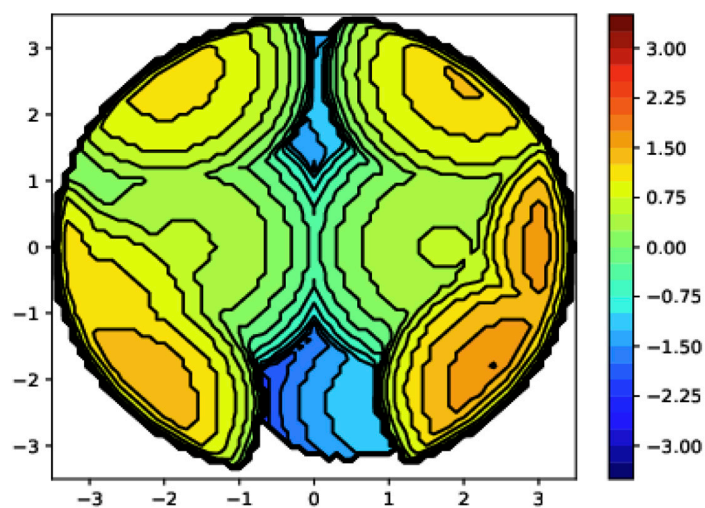

**Fig. S19.** %V<sub>bur</sub> calculation for the dppdtbpf ligand in [Pd<sub>2</sub>(dppdtbpf)<sub>2</sub>(μ-Cl)<sub>2</sub>][BArF<sub>24</sub>]<sub>2</sub>.

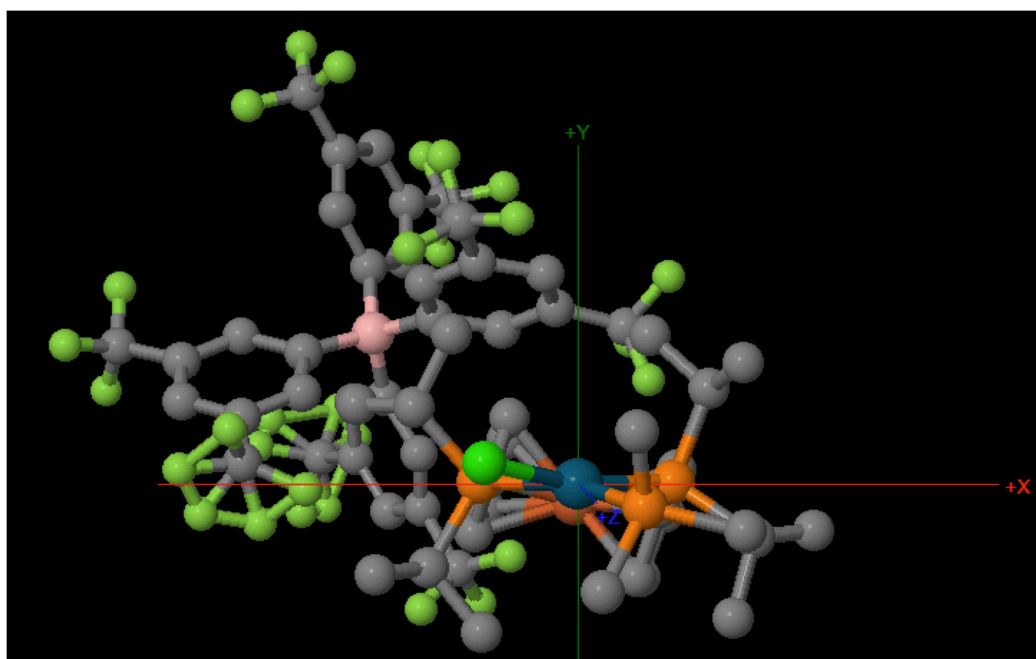

%V Free  
43.4

%V Buried  
56.6

%V tot/V Ex  
99.9

| <u>Quadrant</u> | <u>V f</u> | <u>V b</u> | <u>V t</u> | <u>%V f</u> | <u>%V b</u> |
|-----------------|------------|------------|------------|-------------|-------------|
| SW              | 18.3       | 26.6       | 44.9       | 40.7        | 59.3        |
| NW              | 21.0       | 23.9       | 44.9       | 46.8        | 53.2        |
| NE              | 18.0       | 26.9       | 44.9       | 40.0        | 60.0        |
| SE              | 20.7       | 24.1       | 44.9       | 46.2        | 53.8        |

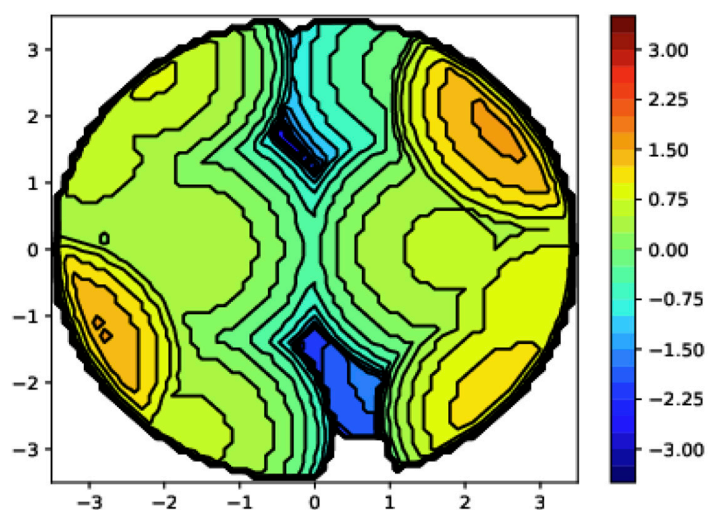

**Fig. S20.** %V<sub>bur</sub> calculation for the dippf ligand in [Pd(dippf)(PMe<sub>3</sub>)Cl][BArF<sub>24</sub>].

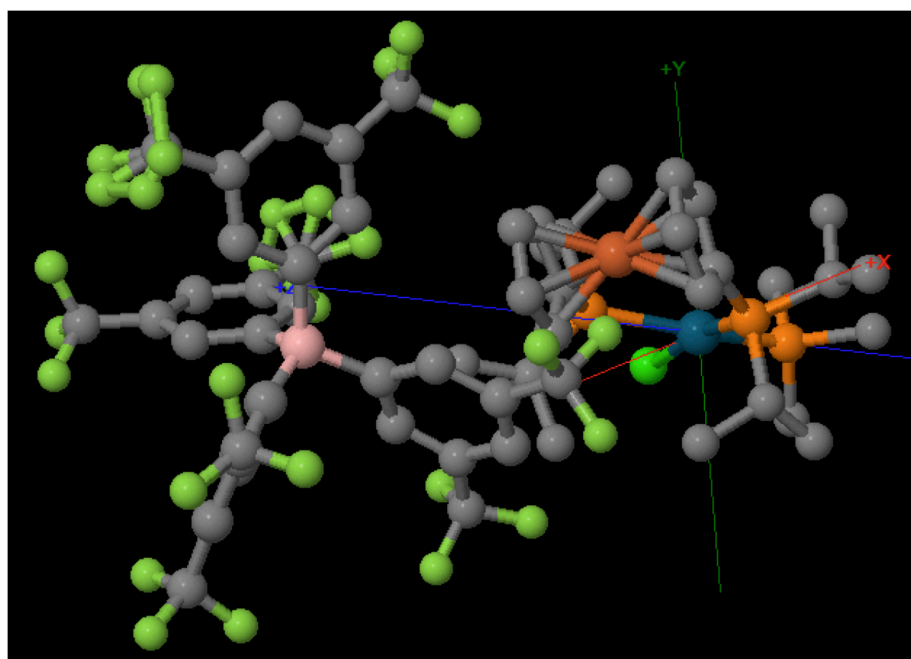

%V Free  
78.4

%V Buried  
21.6

%V tot/V Ex  
99.9

| <u>Quadrant</u> | <u>V f</u> | <u>V b</u> | <u>V t</u> | <u>%V f</u> | <u>%V b</u> |
|-----------------|------------|------------|------------|-------------|-------------|
| SW              | 34.5       | 10.3       | 44.9       | 77.0        | 23.0        |
| NW              | 33.7       | 11.1       | 44.9       | 75.2        | 24.8        |
| NE              | 36.0       | 8.8        | 44.9       | 80.3        | 19.7        |
| SE              | 36.4       | 8.4        | 44.9       | 81.2        | 18.8        |

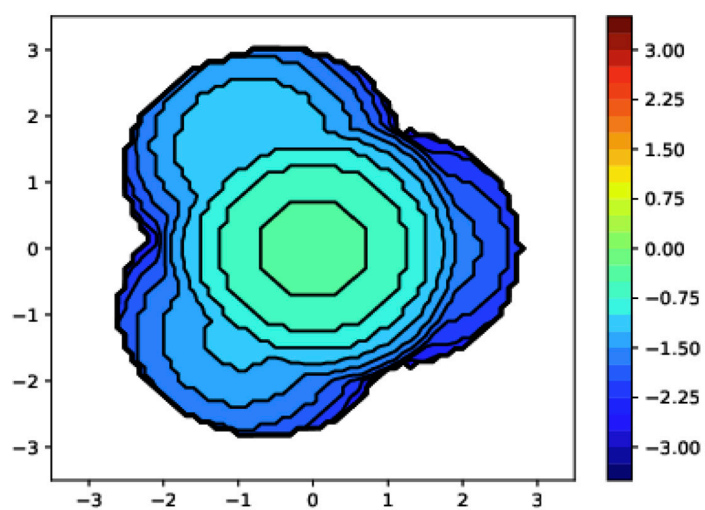

**Fig. S21.** %V<sub>bur</sub> calculation for the PMe<sub>3</sub> ligand in [Pd(dippf)(PMe<sub>3</sub>)Cl][BARf<sub>24</sub>].

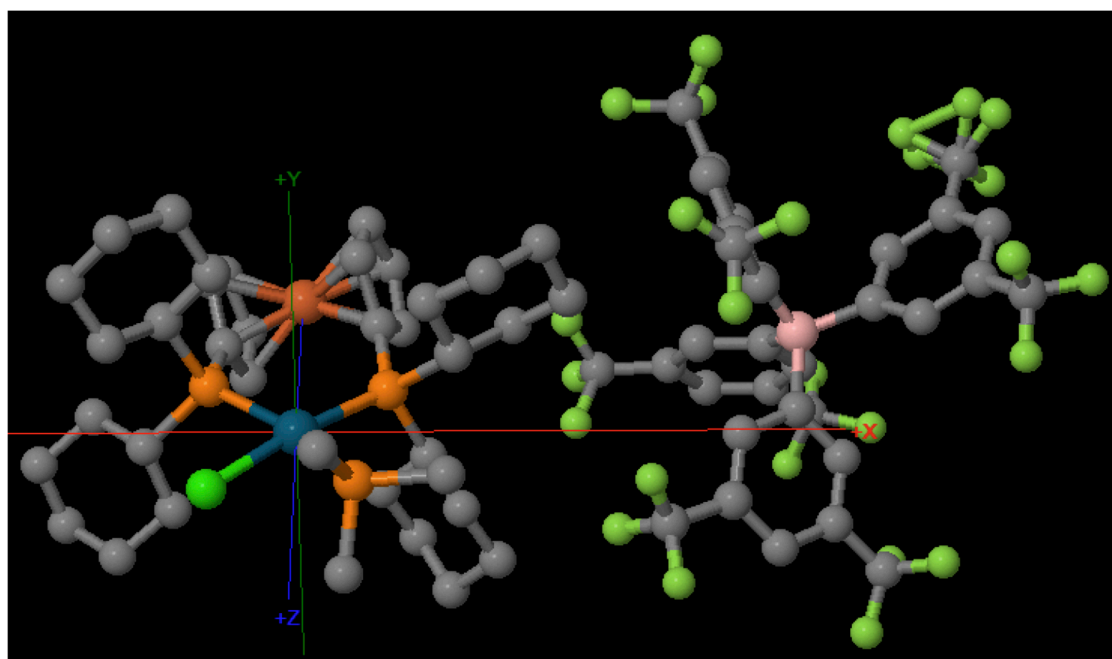

%V Free  
45.0

%V Buried  
55.0

%V tot/V Ex  
99.9

| <u>Quadrant</u> | <u>V f</u> | <u>V b</u> | <u>V t</u> | <u>%V f</u> | <u>%V b</u> |
|-----------------|------------|------------|------------|-------------|-------------|
| SW              | 22.2       | 22.7       | 44.9       | 49.5        | 50.5        |
| NW              | 19.5       | 25.4       | 44.9       | 43.5        | 56.5        |
| NE              | 20.4       | 24.4       | 44.9       | 45.5        | 54.5        |
| SE              | 18.6       | 26.2       | 44.9       | 41.5        | 58.5        |

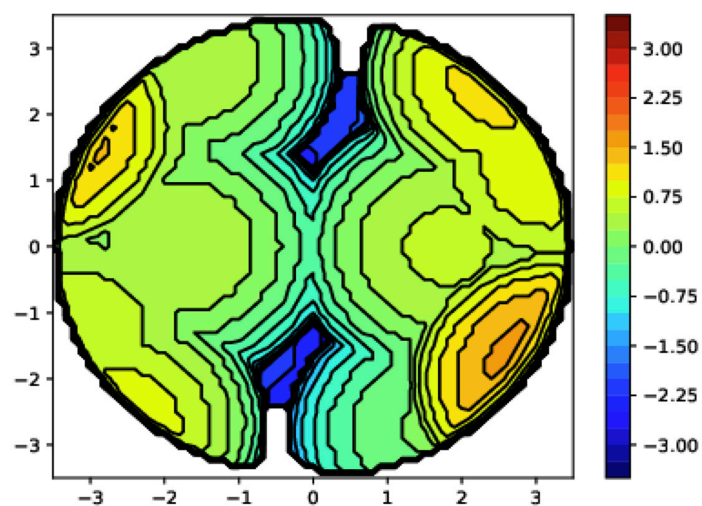

**Fig. S22.** %V<sub>bur</sub> calculation for the dcpf ligand in [Pd(dcpf)(PMe<sub>3</sub>)Cl][BARF<sub>24</sub>].

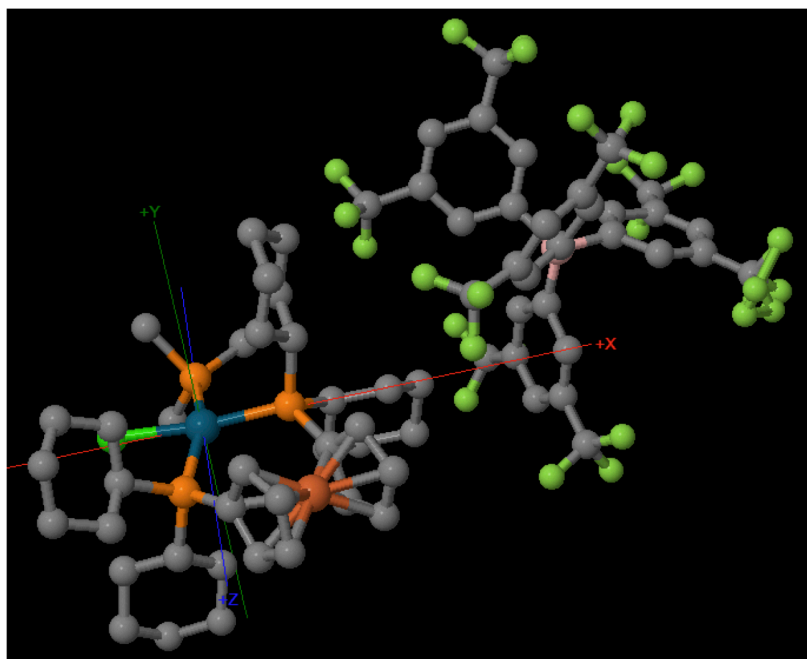

%V Free  
78.5

%V Buried  
21.5

%V tot/V Ex  
99.9

| <u>Quadrant</u> | <u>V f</u> | <u>V b</u> | <u>V t</u> | <u>%V f</u> | <u>%V b</u> |
|-----------------|------------|------------|------------|-------------|-------------|
| SW              | 33.8       | 11.0       | 44.9       | 75.5        | 24.5        |
| NW              | 34.3       | 10.6       | 44.9       | 76.4        | 23.6        |
| NE              | 36.5       | 8.4        | 44.9       | 81.3        | 18.7        |
| SE              | 36.2       | 8.6        | 44.9       | 80.8        | 19.2        |

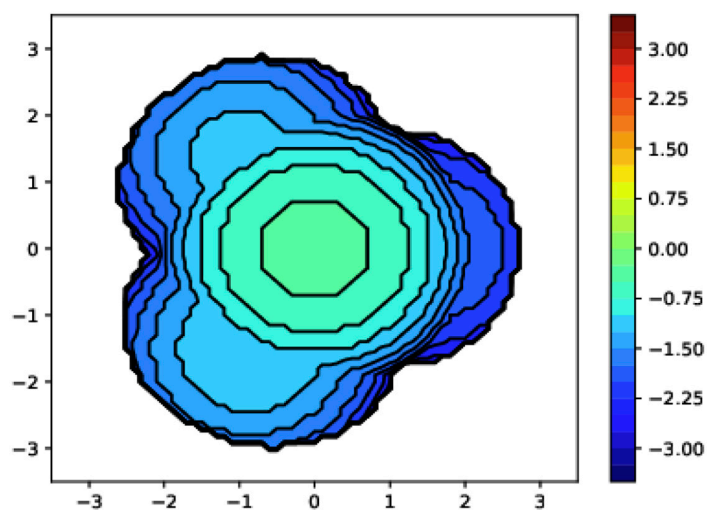

**Fig. S23.** %V<sub>bur</sub> calculation for the PMe<sub>3</sub> ligand in [Pd(dcpf)(PMe<sub>3</sub>)Cl][BARF<sub>24</sub>].



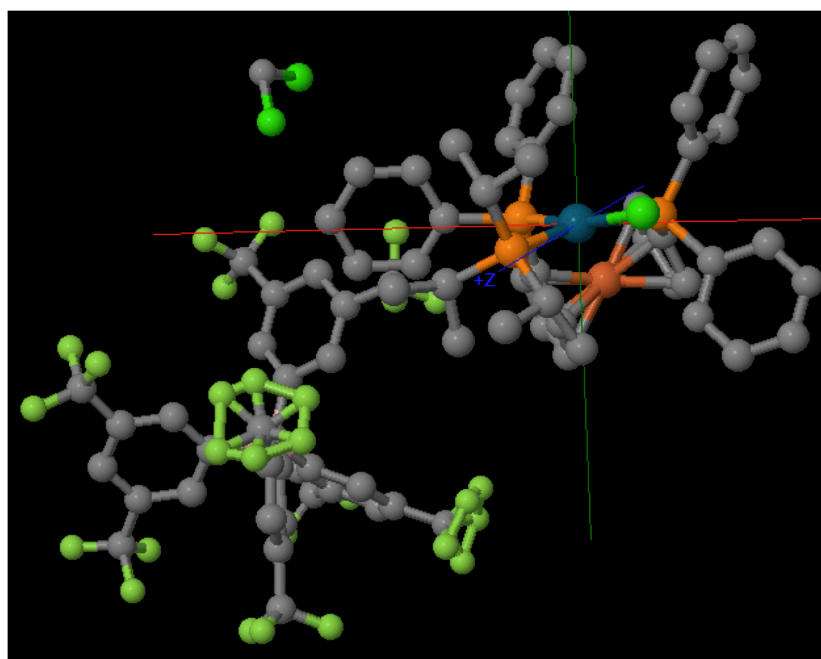

%V Free  
47.9

%V Buried  
52.1

%V tot/V Ex  
99.9

| <u>Quadrant</u> | <u>V f</u> | <u>V b</u> | <u>V t</u> | <u>%V f</u> | <u>%V b</u> |
|-----------------|------------|------------|------------|-------------|-------------|
| SW              | 22.8       | 22.0       | 44.9       | 50.9        | 49.1        |
| NW              | 21.8       | 23.1       | 44.9       | 48.5        | 51.5        |
| NE              | 21.6       | 23.3       | 44.9       | 48.1        | 51.9        |
| SE              | 19.8       | 25.1       | 44.9       | 44.1        | 55.9        |

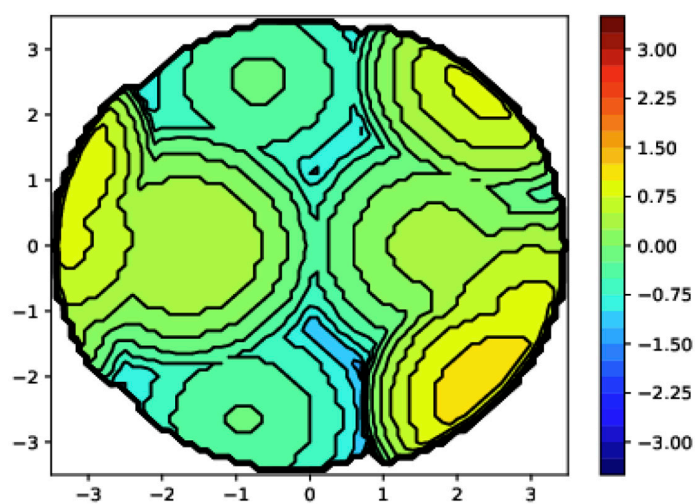

**Fig. S24.** %V<sub>bur</sub> calculation for the dppf ligand in [Pd(dppf)(P'Pr<sub>3</sub>)Cl][BArF<sub>24</sub>].

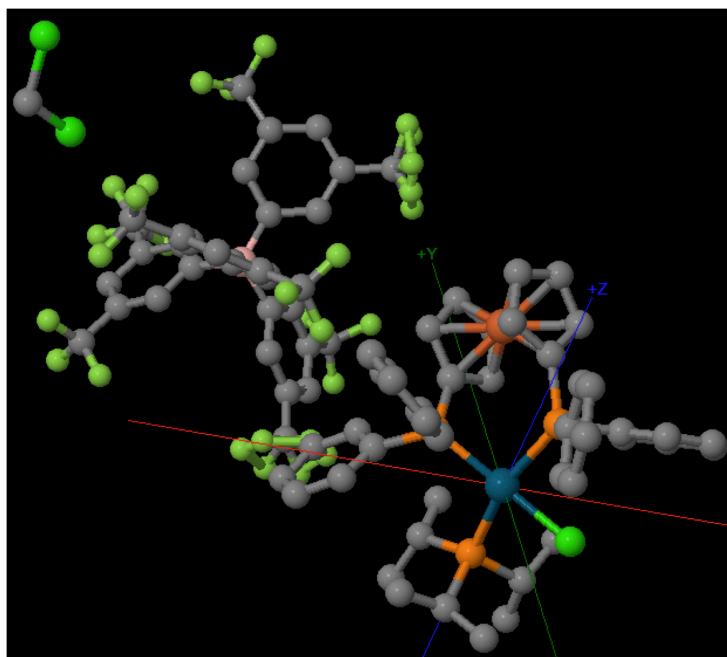

%V Free  
70.9

%V Buried  
29.1

%V tot/V Ex  
99.9

| <u>Quadrant</u> | <u>V f</u> | <u>V b</u> | <u>V t</u> | <u>%V f</u> | <u>%V b</u> |
|-----------------|------------|------------|------------|-------------|-------------|
| SW              | 31.3       | 13.5       | 44.9       | 69.9        | 30.1        |
| NW              | 33.5       | 11.3       | 44.9       | 74.8        | 25.2        |
| NE              | 29.4       | 15.5       | 44.9       | 65.5        | 34.5        |
| SE              | 33.0       | 11.9       | 44.9       | 73.5        | 26.5        |

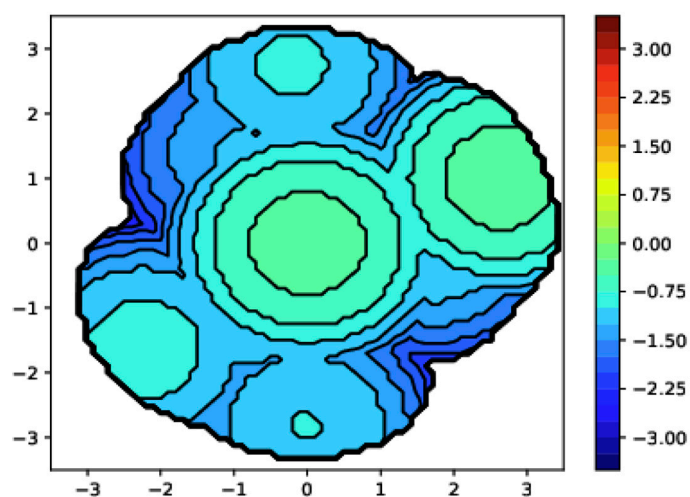

**Fig. S25.** %V<sub>bur</sub> calculation for the P<sup>i</sup>Pr<sub>3</sub> ligand in [Pd(dppf)(P<sup>i</sup>Pr<sub>3</sub>)Cl][BARF<sub>24</sub>].

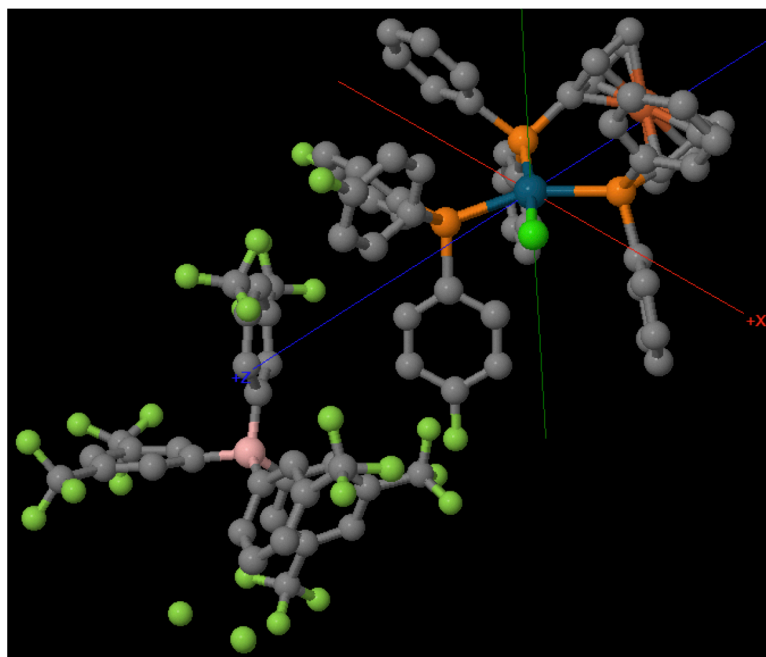

%V Free  
43.9

%V Buried  
56.1

%V tot/V Ex  
99.9

| <u>Quadrant</u> | <u>V f</u> | <u>V b</u> | <u>V t</u> | <u>%V f</u> | <u>%V b</u> |
|-----------------|------------|------------|------------|-------------|-------------|
| SW              | 19.8       | 25.1       | 44.9       | 44.1        | 55.9        |
| NW              | 18.1       | 26.7       | 44.9       | 40.4        | 59.6        |
| NE              | 20.0       | 24.9       | 44.9       | 44.5        | 55.5        |
| SE              | 20.9       | 23.9       | 44.9       | 46.6        | 53.4        |

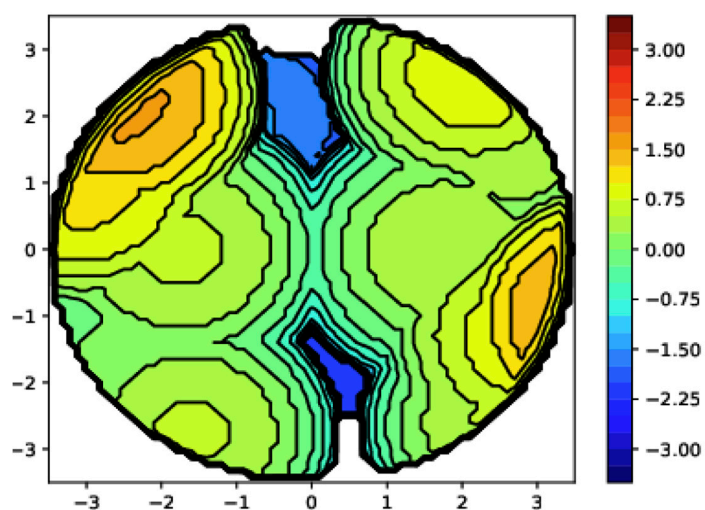

**Fig. S26.** %V<sub>bur</sub> calculation for the dppf ligand in [Pd(dppf)(P(*p*-C<sub>6</sub>H<sub>4</sub>F)<sub>3</sub>)Cl][BArF<sub>24</sub>].

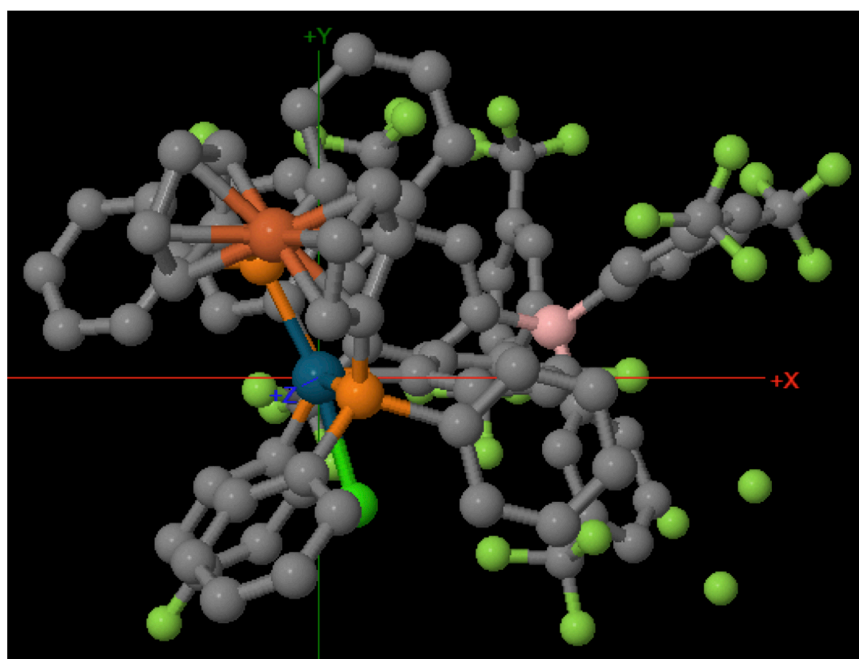

%V Free  
72.1

%V Buried  
27.9

%V tot/V Ex  
99.9

| <u>Quadrant</u> | <u>V f</u> | <u>V b</u> | <u>V t</u> | <u>%V f</u> | <u>%V b</u> |
|-----------------|------------|------------|------------|-------------|-------------|
| SW              | 30.4       | 14.5       | 44.9       | 67.8        | 32.2        |
| NW              | 35.5       | 9.4        | 44.9       | 79.2        | 20.8        |
| NE              | 32.1       | 12.8       | 44.9       | 71.5        | 28.5        |
| SE              | 31.3       | 13.5       | 44.9       | 69.8        | 30.2        |

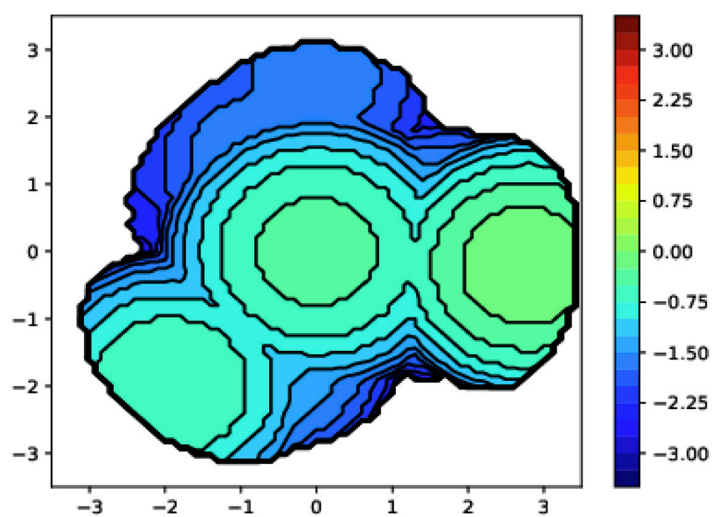

**Fig. S27.** %V<sub>bur</sub> calculation for the P(*p*-C<sub>6</sub>H<sub>4</sub>F)<sub>3</sub> ligand in [Pd(dppf)(P(*p*-C<sub>6</sub>H<sub>4</sub>F)<sub>3</sub>)Cl][BARF<sub>24</sub>].

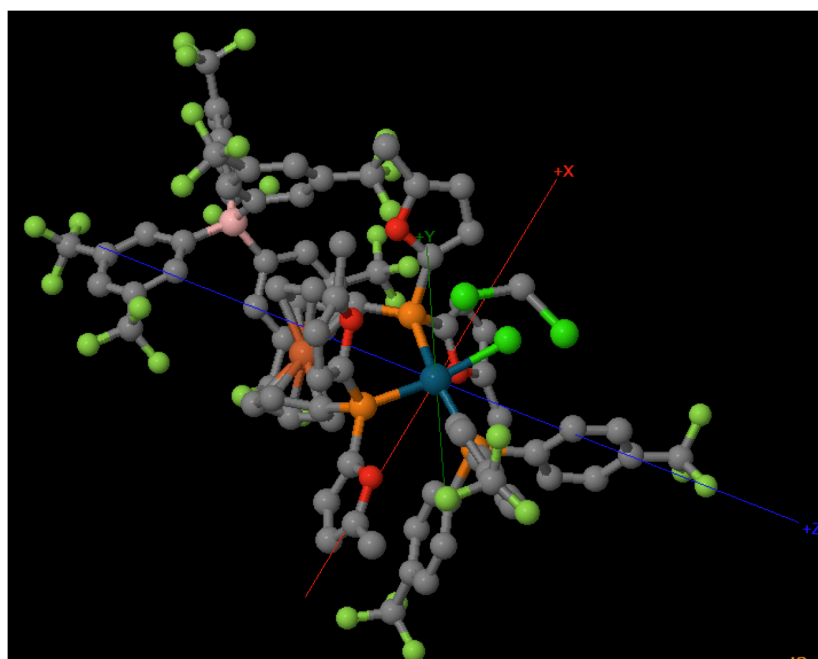

%V Free  
48.7

%V Buried  
51.3

%V tot/V Ex  
99.9

| <u>Quadrant</u> | <u>V f</u> | <u>V b</u> | <u>V t</u> | <u>%V f</u> | <u>%V b</u> |
|-----------------|------------|------------|------------|-------------|-------------|
| SW              | 24.2       | 20.7       | 44.9       | 53.9        | 46.1        |
| NW              | 21.4       | 23.5       | 44.9       | 47.7        | 52.3        |
| NE              | 24.4       | 20.5       | 44.9       | 54.4        | 45.6        |
| SE              | 17.4       | 27.4       | 44.9       | 38.8        | 61.2        |

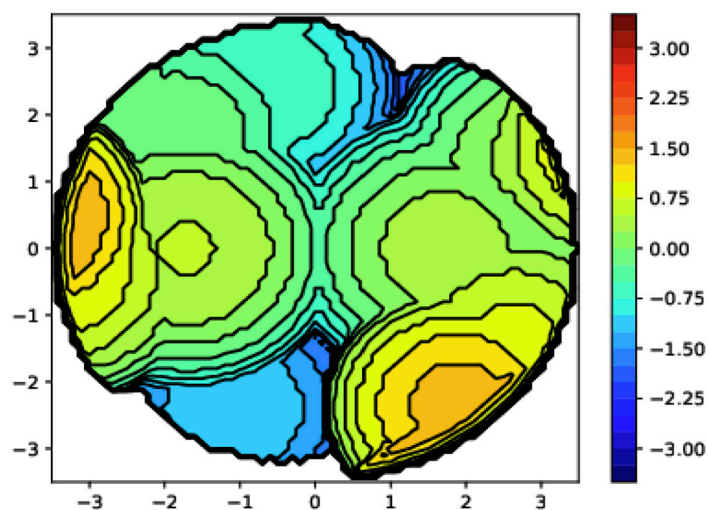

**Fig. S28.** %V<sub>bur</sub> calculation for the dfurpf ligand in [Pd(dfurpf)(P(*p*-C<sub>6</sub>H<sub>4</sub>CF<sub>3</sub>)<sub>3</sub>)Cl][BArF<sub>24</sub>].

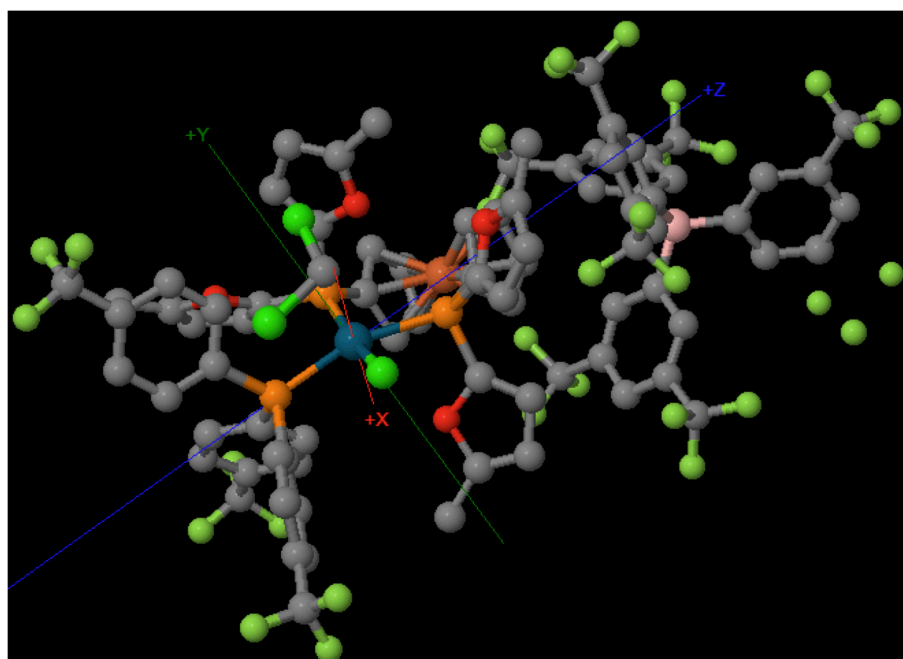

%V Free  
71.3

%V Buried  
28.7

%V tot/V Ex  
99.9

| <u>Quadrant</u> | <u>V f</u> | <u>V b</u> | <u>V t</u> | <u>%V f</u> | <u>%V b</u> |
|-----------------|------------|------------|------------|-------------|-------------|
| SW              | 33.6       | 11.3       | 44.9       | 74.9        | 25.1        |
| NW              | 30.3       | 14.5       | 44.9       | 67.6        | 32.4        |
| NE              | 34.2       | 10.6       | 44.9       | 76.3        | 23.7        |
| SE              | 29.8       | 15.1       | 44.9       | 66.4        | 33.6        |

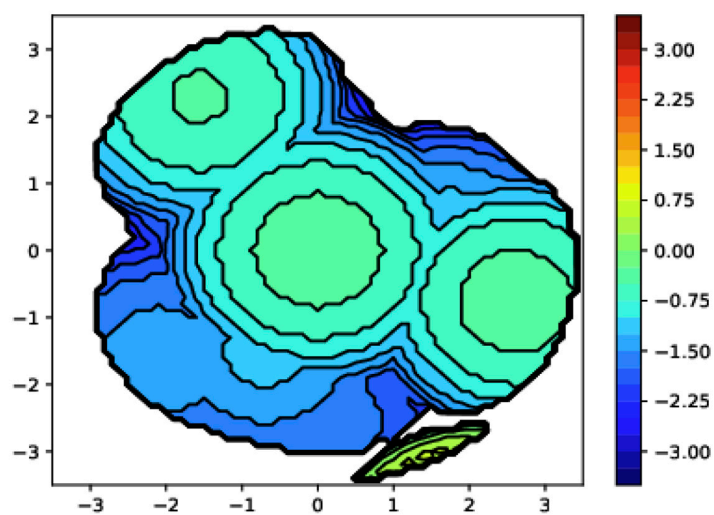

**Fig. S29.** %V<sub>bur</sub> calculation for the P(*p*-C<sub>6</sub>H<sub>4</sub>CF<sub>3</sub>)<sub>3</sub> ligand in [Pd(dfurpf)(P(*p*-C<sub>6</sub>H<sub>4</sub>CF<sub>3</sub>)<sub>3</sub>)Cl][BArF<sub>24</sub>].

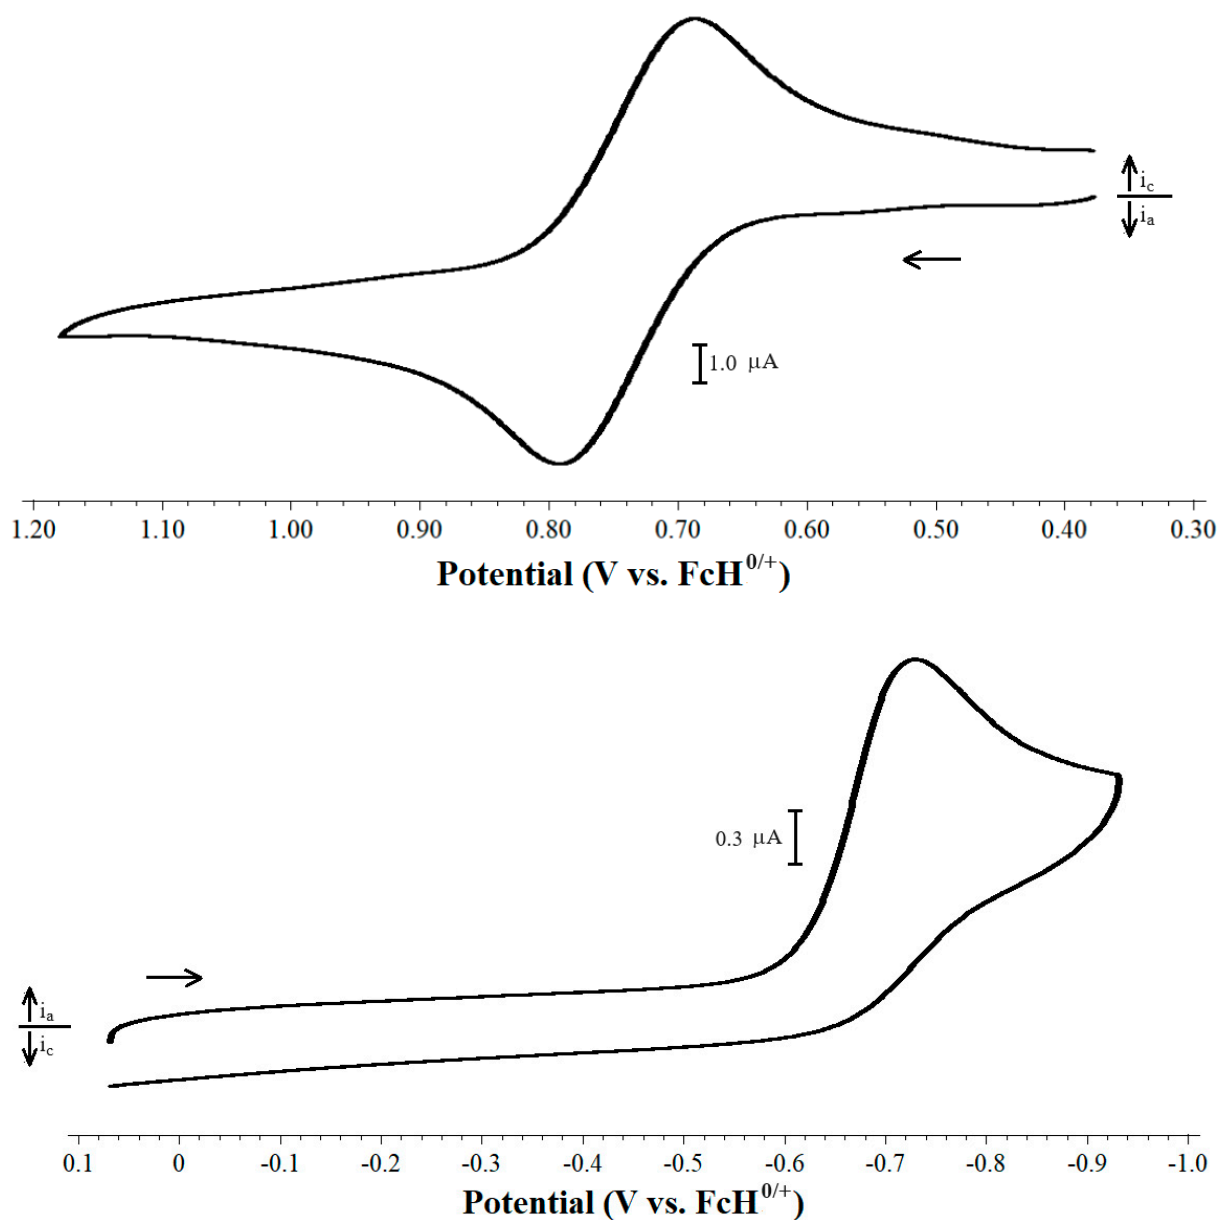

**Fig. S30.** CV scans of 1.0 mM [Pd<sub>2</sub>(dfurpf)<sub>2</sub>(μ-Cl)<sub>2</sub>][BArF<sub>24</sub>]<sub>2</sub> with 0.1 M [NBu<sub>4</sub>][PF<sub>6</sub>] as the supporting electrolyte measured at 100 mV s<sup>-1</sup>.

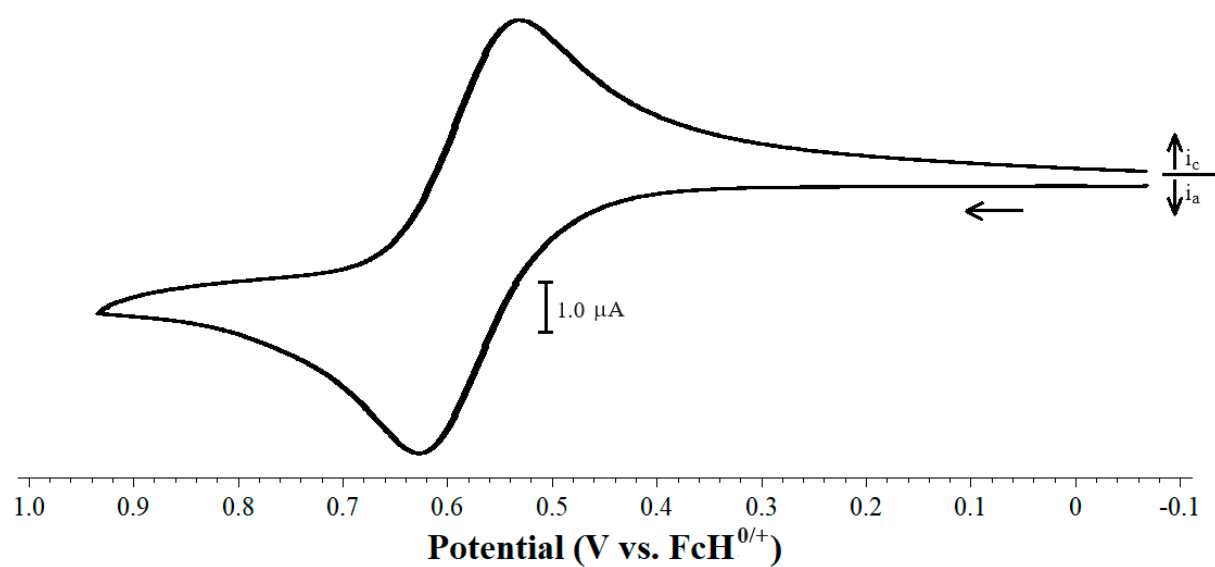

**Fig. S31.** CV scan of 1.0 mM  $[\text{Pd}(\text{dippf})(\text{PMe}_3)\text{Cl}][\text{BArF}_{24}]$  with 0.1 M  $[\text{NBu}_4][\text{PF}_6]$  as the supporting electrolyte measured at  $100 \text{ mV s}^{-1}$ .



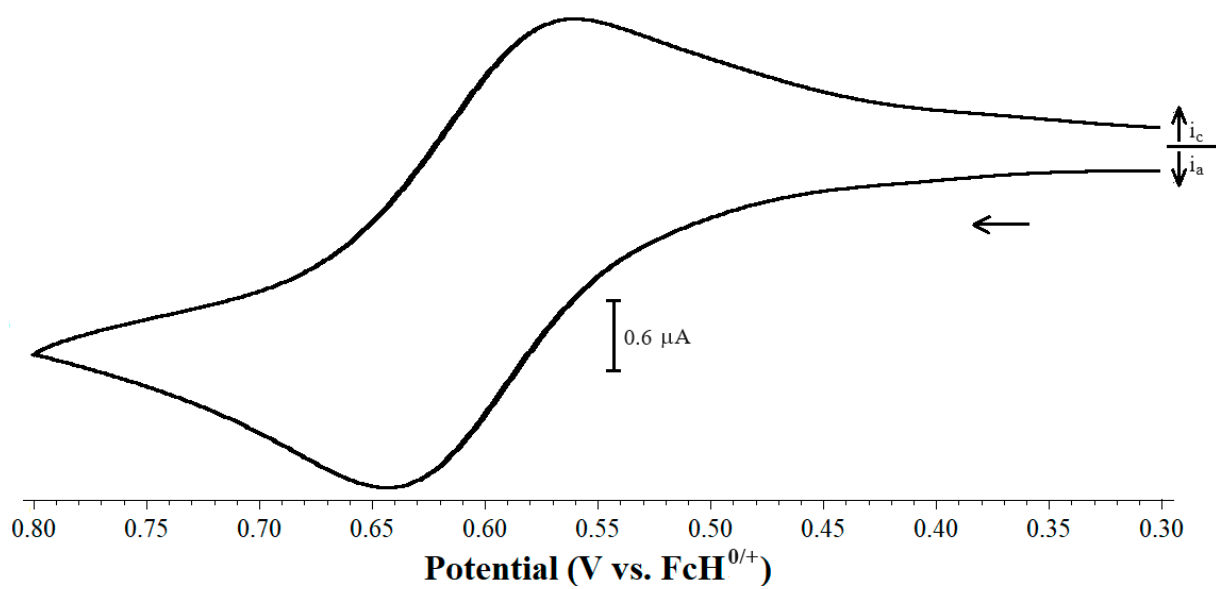

**Fig. S32.** CV scan of 1.0 mM  $[\text{Pd}(\text{dippf})(\text{PPh}_3)\text{Cl}][\text{BArF}_{24}]$  with 0.1 M  $[\text{NBu}_4][\text{PF}_6]$  as the supporting electrolyte measured at  $100 \text{ mV s}^{-1}$ .

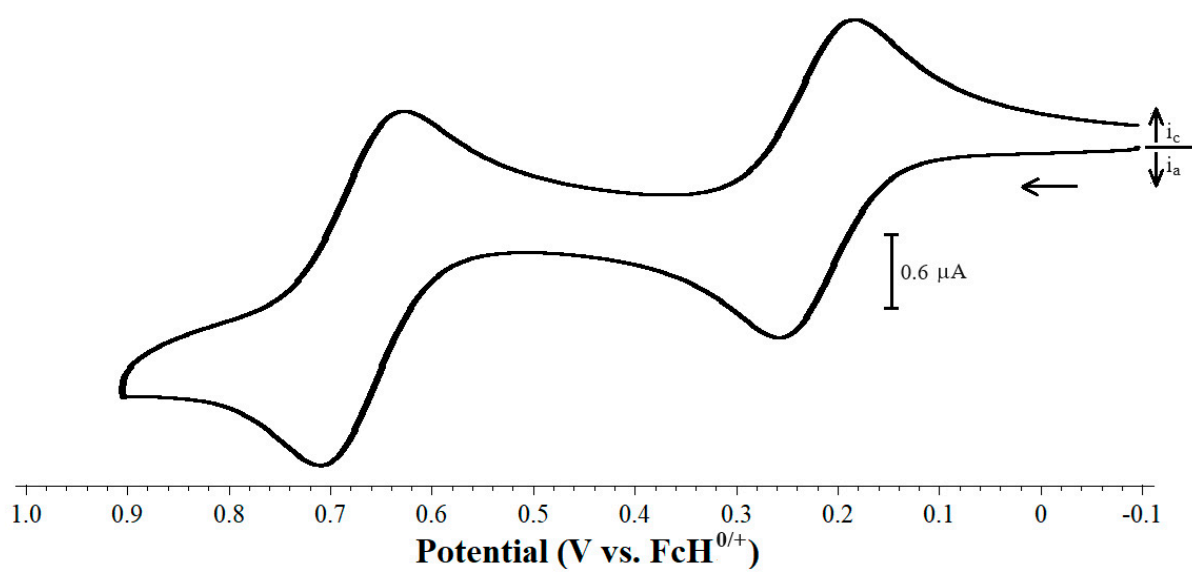

**Fig. S33.** CV scan of 1.0 mM  $[\text{Pd}(\text{dippf})(\text{PPh}_2\text{Fc})\text{Cl}][\text{BArF}_{24}]$  with 0.1 M  $[\text{NBu}_4][\text{PF}_6]$  as the supporting electrolyte measured at  $100 \text{ mV s}^{-1}$ .

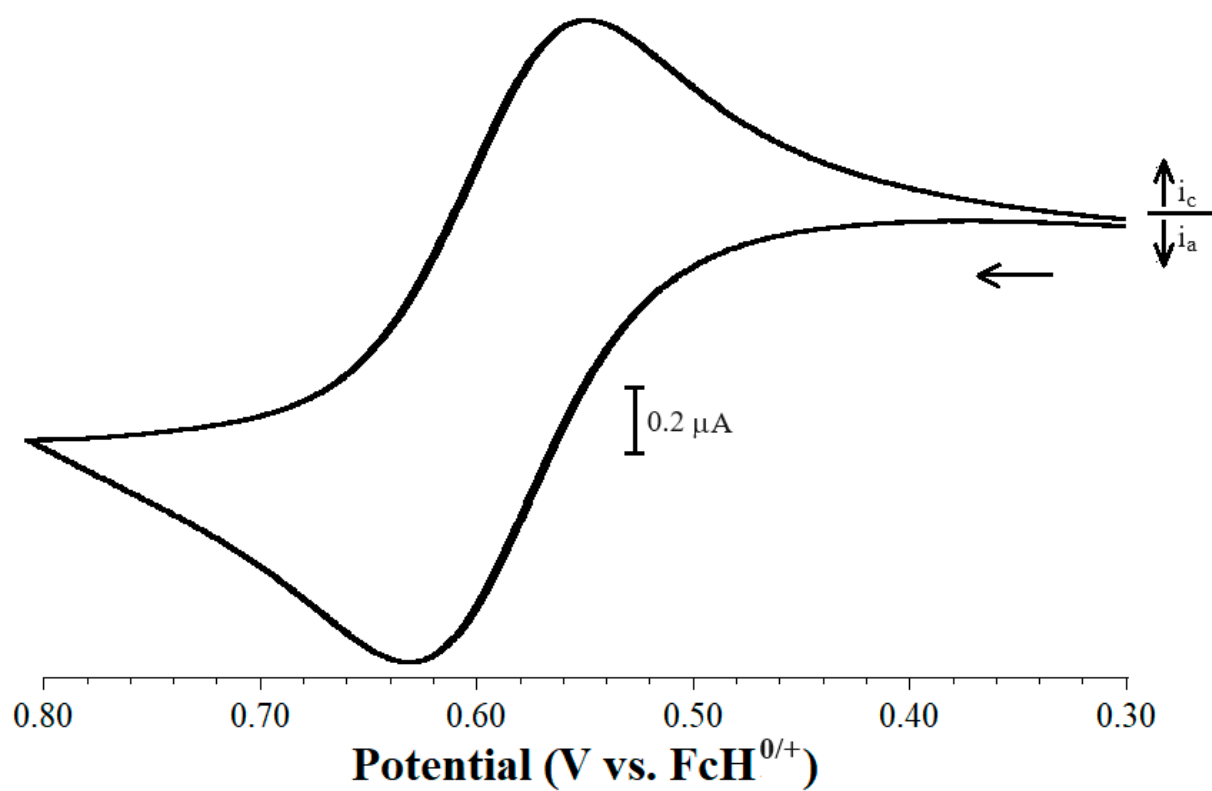

**Fig. S34.** CV scan of 1.0 mM  $[\text{Pd}(\text{dppdtbpf})(\text{PMe}_3)\text{Cl}][\text{BArF}_{24}]$  with 0.1 M  $[\text{NBu}_4][\text{PF}_6]$  as the supporting electrolyte measured at  $100 \text{ mV s}^{-1}$ .

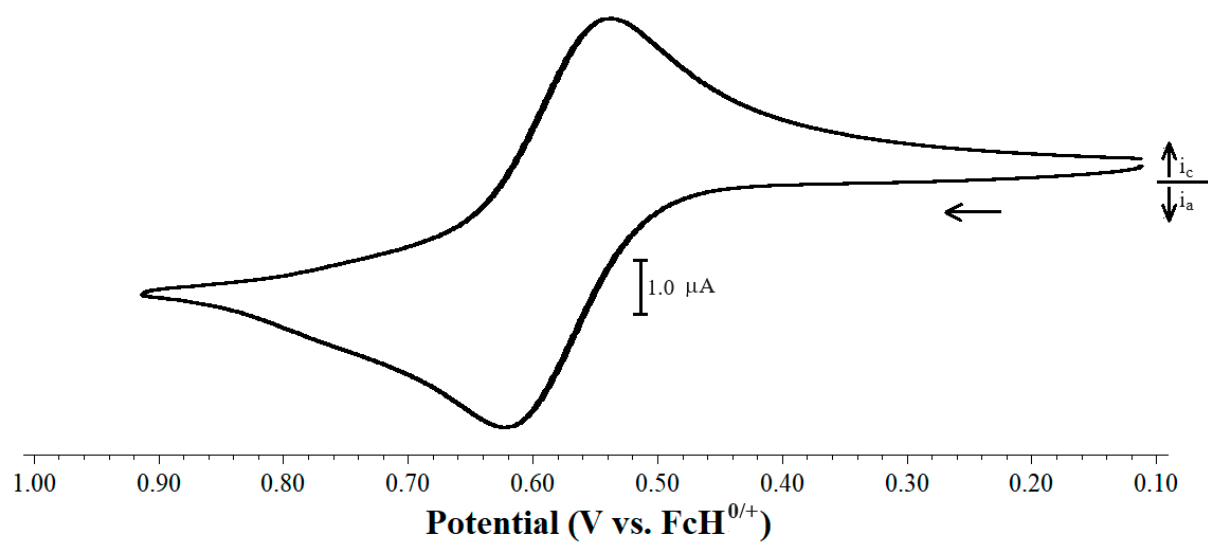

**Fig. S35.** CV scan of 1.0 mM [Pd(dppdtbpf)(PPh<sub>3</sub>)Cl][BArF<sub>24</sub>] with 0.1 M [NBu<sub>4</sub>][PF<sub>6</sub>] as the supporting electrolyte measured at 100 mV s<sup>-1</sup>.

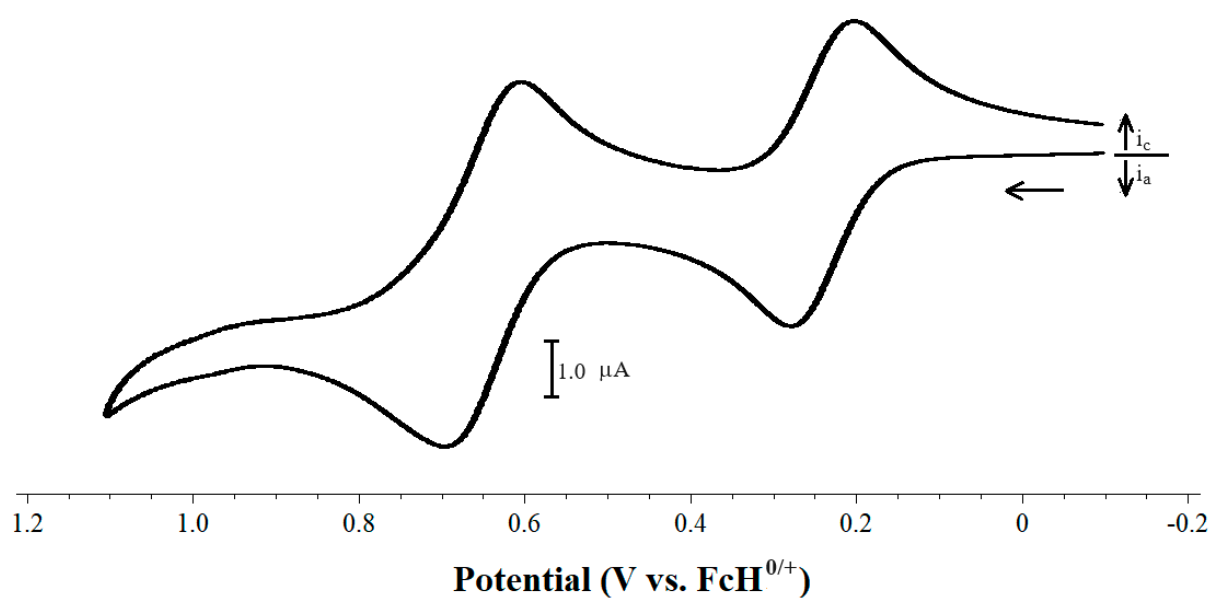

**Fig. S36.** CV scan of 1.0 mM  $[\text{Pd}(\text{dppdtbpf})(\text{PPh}_2\text{Fc})\text{Cl}][\text{BArF}_{24}]$  with 0.1 M  $[\text{NBu}_4][\text{PF}_6]$  as the supporting electrolyte measured at  $100 \text{ mV s}^{-1}$ .

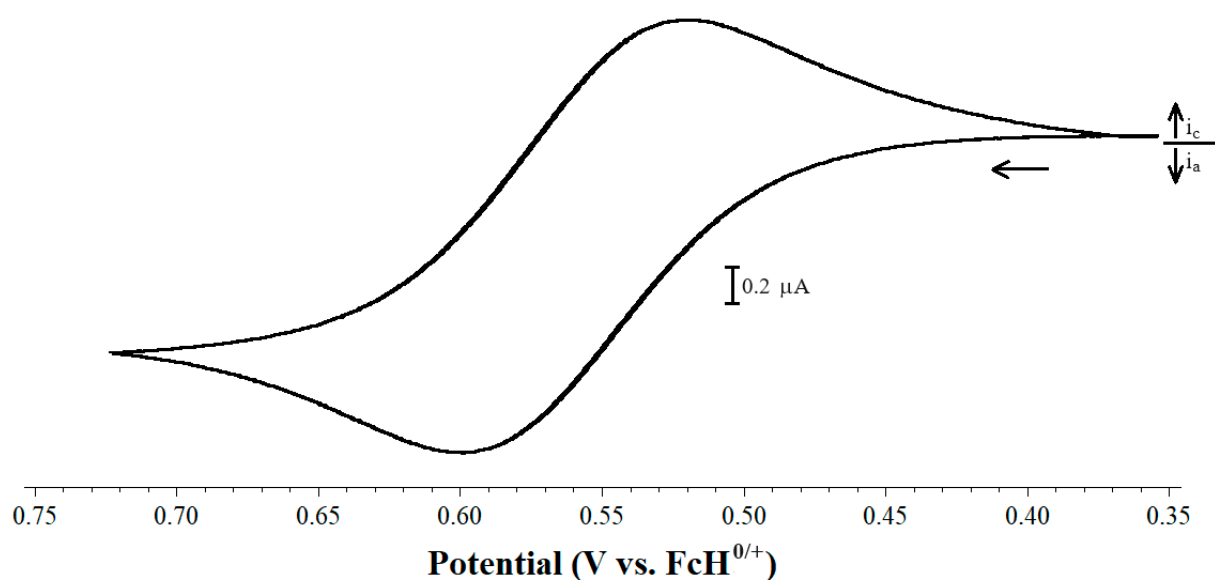

**Fig. S37.** CV scan of 1.0 mM  $[\text{Pd}(\text{dcpf})(\text{PMe}_3)\text{Cl}][\text{BArF}_{24}]$  with 0.1 M  $[\text{NBu}_4][\text{PF}_6]$  as the supporting electrolyte measured at  $100 \text{ mV s}^{-1}$ .

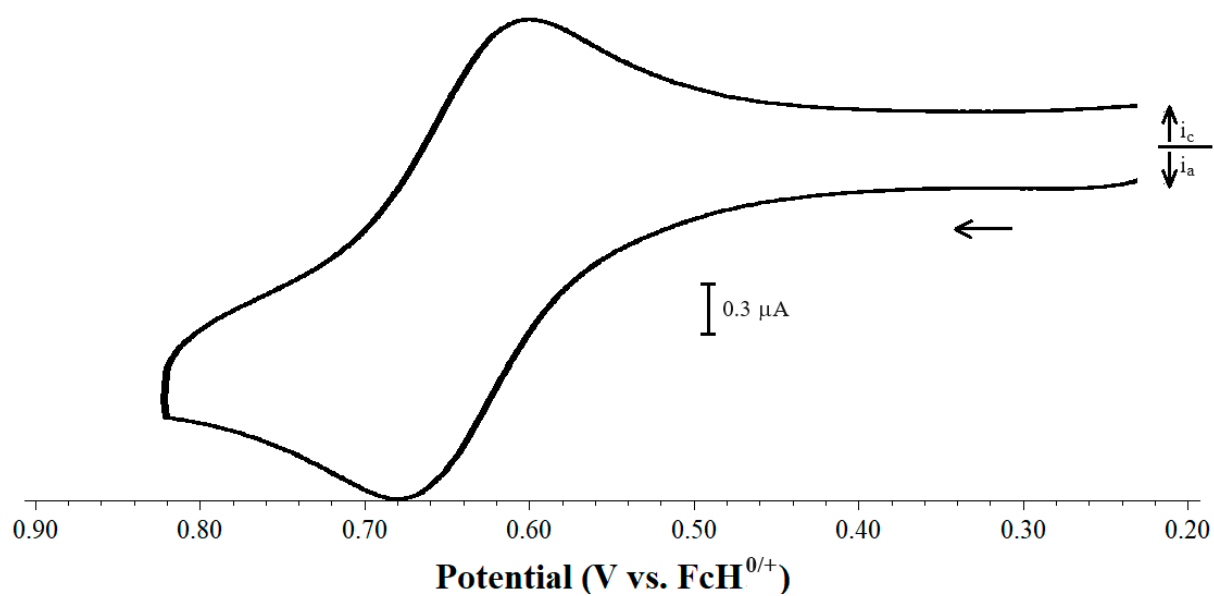

**Fig. S38.** CV scan of 1.0 mM  $[\text{Pd}(\text{dfurpf})(\text{PMe}_3)\text{Cl}][\text{BARF}_{24}]$  with 0.1 M  $[\text{NBu}_4][\text{PF}_6]$  as the supporting electrolyte measured at  $100 \text{ mV s}^{-1}$ .

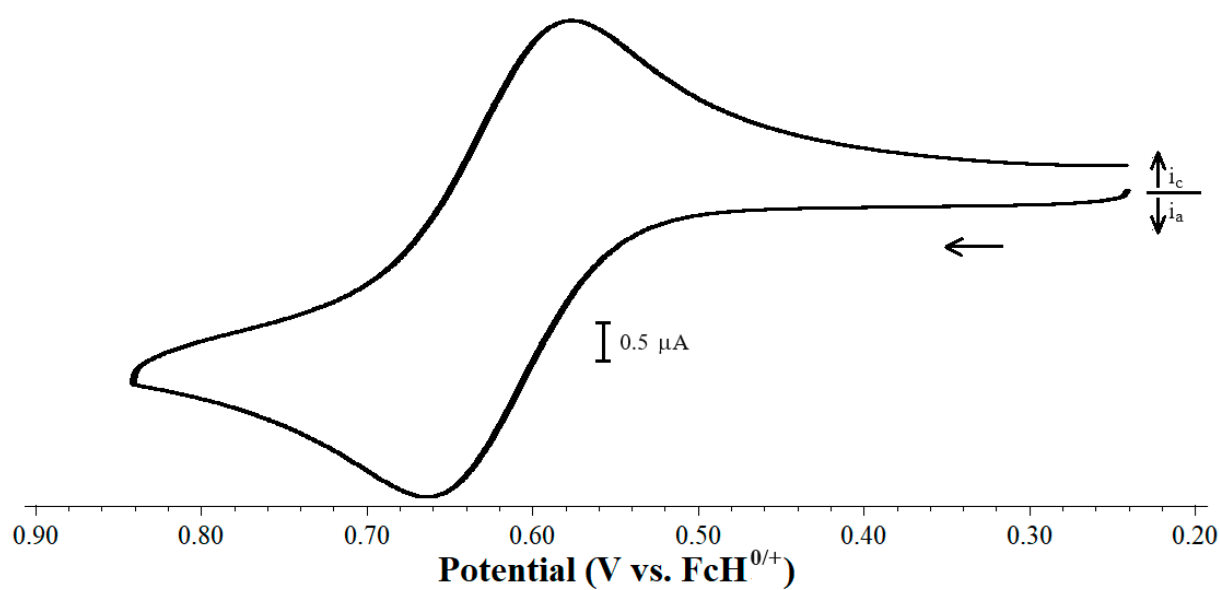

**Fig. S39.** CV scan of 1.0 mM [Pd(dfurpf)(PPh<sub>3</sub>)Cl][BArF<sub>24</sub>] with 0.1 M [NBu<sub>4</sub>][PF<sub>6</sub>] as the supporting electrolyte measured at 100 mV s<sup>-1</sup>.



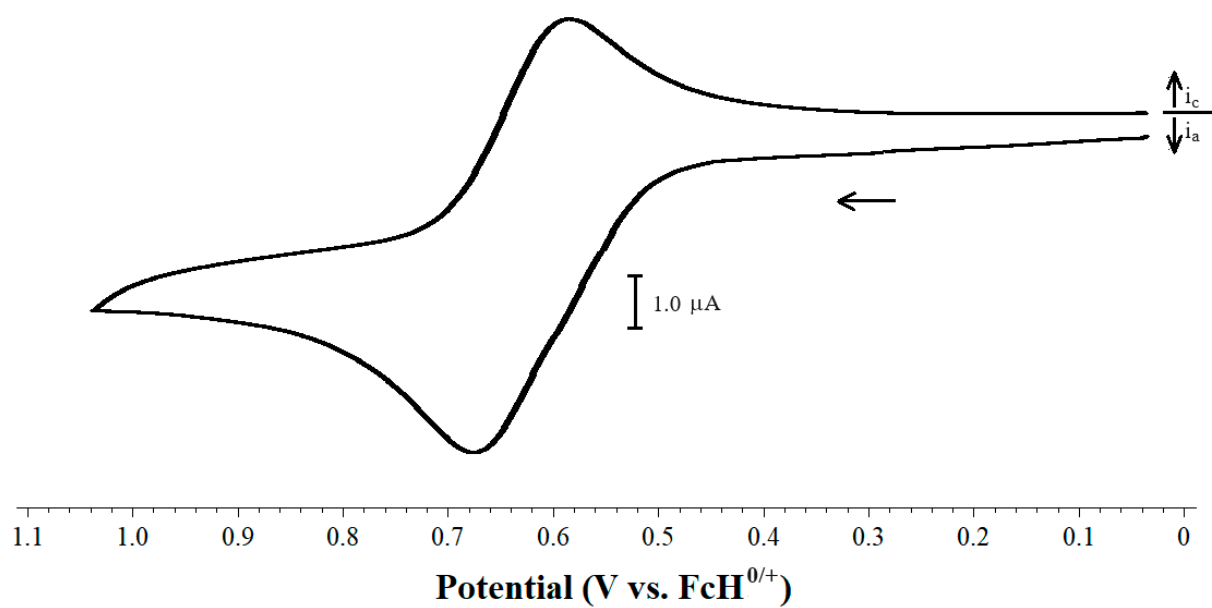

**Fig. S40.** CV scan of 1.0 mM [Pd(dppf)(P(NMe<sub>2</sub>)<sub>3</sub>)Cl][BArF<sub>24</sub>] with 0.1 M [NBu<sub>4</sub>][PF<sub>6</sub>] as the supporting electrolyte measured at 100 mV s<sup>-1</sup>.

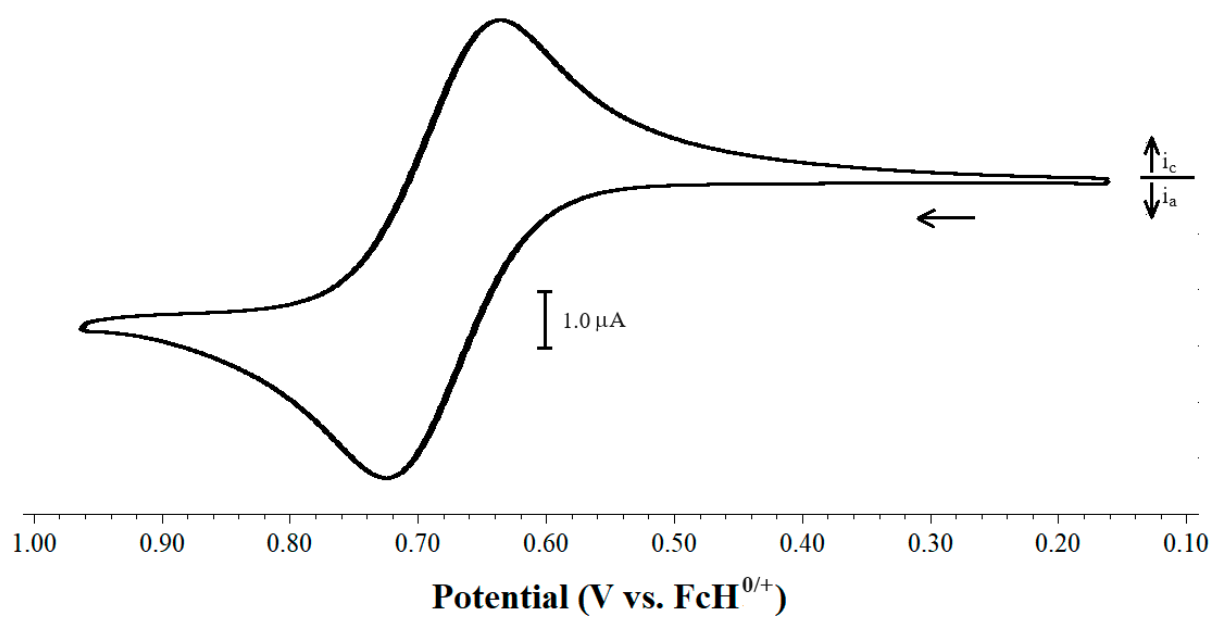

**Fig. S41.** CV scan of 1.0 mM [Pd(dppf)(P(CH<sub>2</sub>Ph)<sub>3</sub>)Cl][BArF<sub>24</sub>] with 0.1 M [NBu<sub>4</sub>][PF<sub>6</sub>] as the supporting electrolyte measured at 100 mV s<sup>-1</sup>.

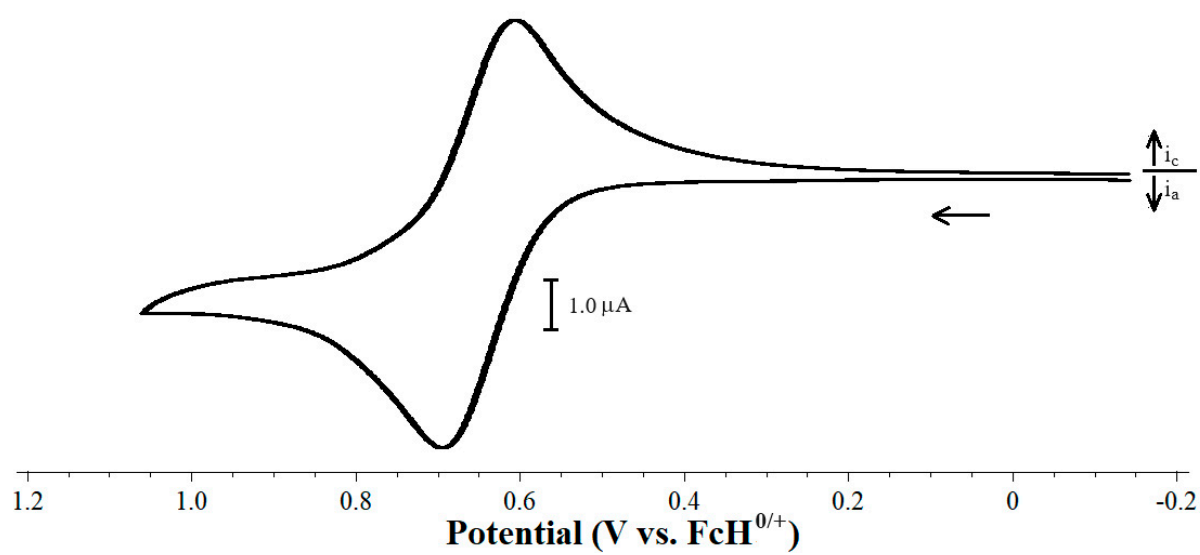

**Fig. S42.** CV scan of 1.0 mM [Pd(dppf)(P(*m*-tol)<sub>3</sub>)Cl][BArF<sub>24</sub>] with 0.1 M [NBu<sub>4</sub>][PF<sub>6</sub>] as the supporting electrolyte measured at 100 mV s<sup>-1</sup>.

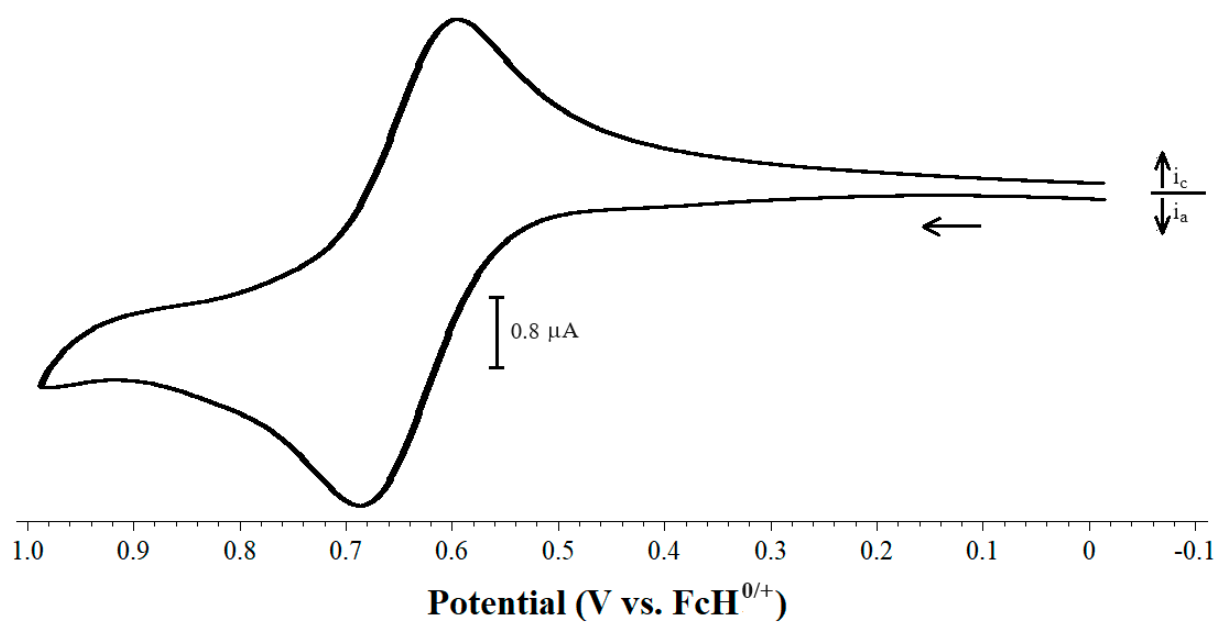

**Fig. S43.** CV scan of 1.0 mM [Pd(dppf)(P(*p*-tol)<sub>3</sub>)Cl][BArF<sub>24</sub>] with 0.1 M [NBu<sub>4</sub>][PF<sub>6</sub>] as the supporting electrolyte measured at 100 mV s<sup>-1</sup>.

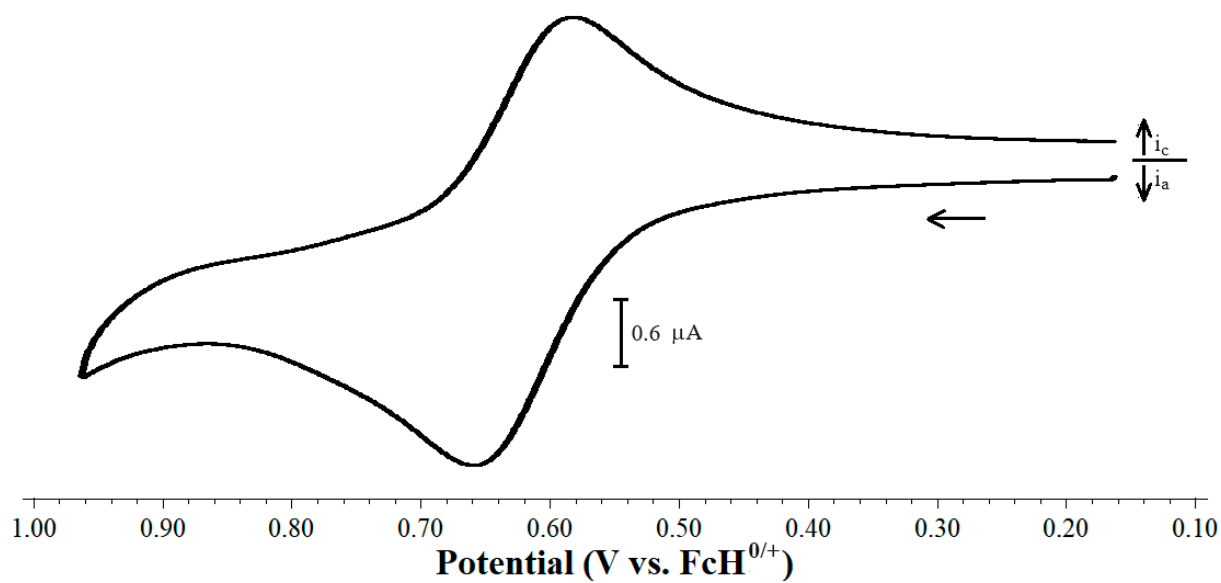

**Fig. S44.** CV scan of 1.0 mM [Pd(dppf)(P(*p*-C<sub>6</sub>H<sub>4</sub>OMe)<sub>3</sub>)Cl][BArF<sub>24</sub>] with 0.1 M [NBu<sub>4</sub>][PF<sub>6</sub>] as the supporting electrolyte measured at 100 mV s<sup>-1</sup>.

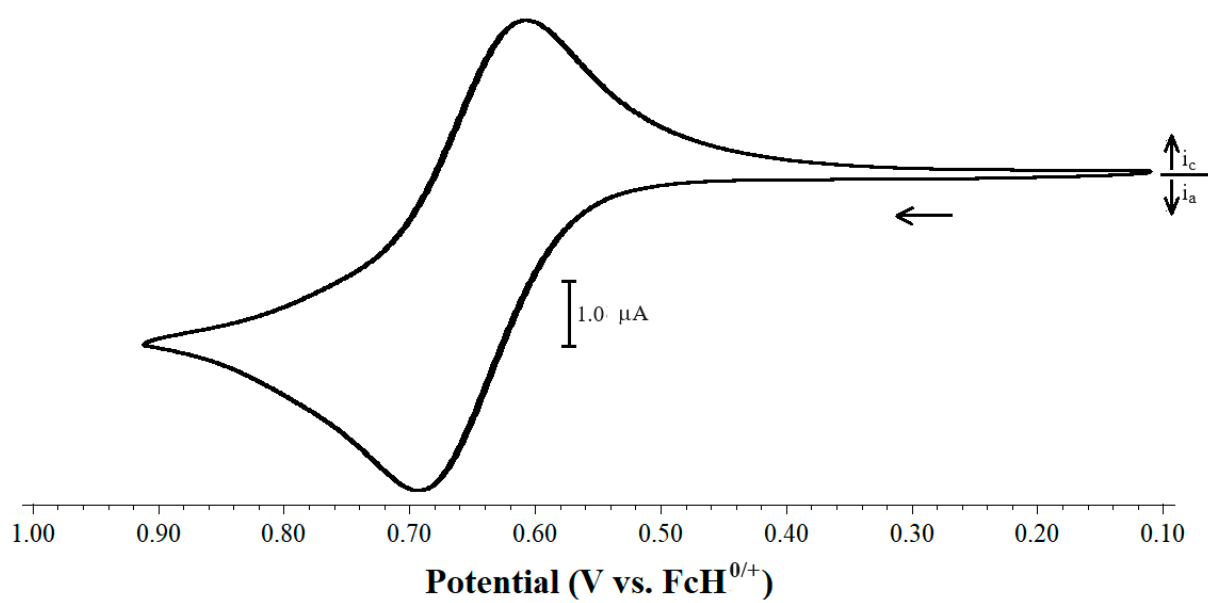

**Fig. S45.** CV scan of 1.0 mM [Pd(dppf)(P(*p*-C<sub>6</sub>H<sub>4</sub>F)<sub>3</sub>)Cl][BArF<sub>24</sub>] with 0.1 M [NBu<sub>4</sub>][PF<sub>6</sub>] as the supporting electrolyte measured at 100 mV s<sup>-1</sup>.

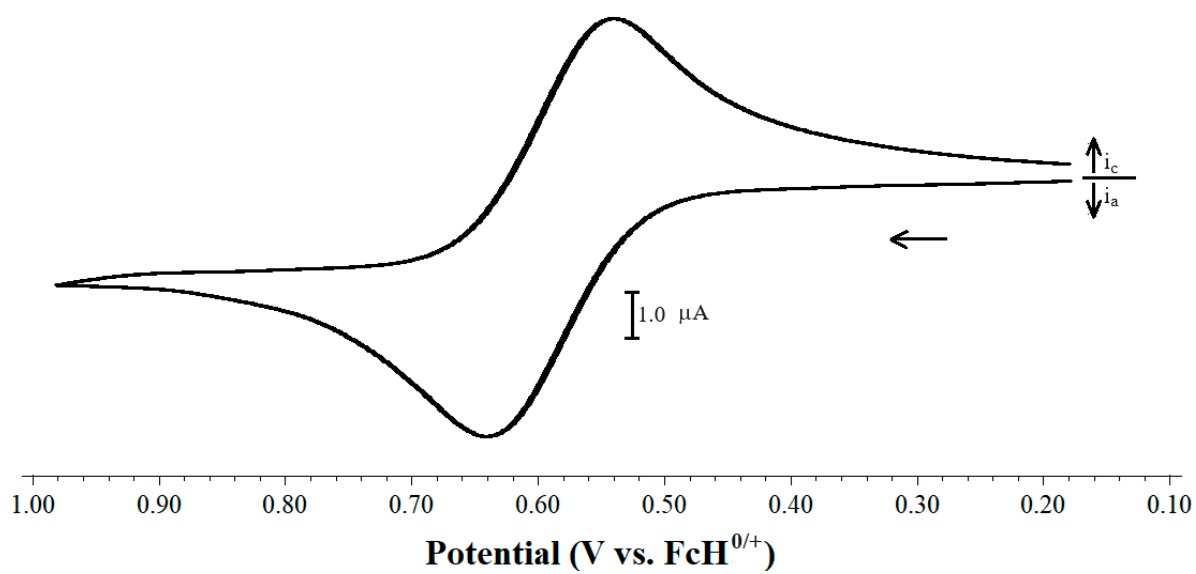

**Fig. S46.** CV scan of 1.0 mM [Pd(dfurpf)(P(*p*-C<sub>6</sub>H<sub>4</sub>CF<sub>3</sub>)<sub>3</sub>)Cl][BArF<sub>24</sub>] with 0.1 M [NBu<sub>4</sub>][PF<sub>6</sub>] as the supporting electrolyte measured at 100 mV s<sup>-1</sup>.
